# Supplementary material for: Daily accumulation rates of floating debris and attached biota on continental and oceanic island shores in the SE Pacific: testing predictions based on global models
Source: PeerJ. 2023 Jul 27;11:e15550. doi: 10.7717/peerj.15550 (PMC10387232; doi:10.7717/peerj.15550)
Supplement: Data S1 — Daily litter accumulation frequencies (all AMD and AMD with pelagic epibionts only) by item category and beach, epibiont matrices including all rafts on all beaches, results of buoyancy experiments and measurements of Lepas spp. capitellum lengths. [file peerj-11-15550-s014.xlsx]

## Sheet: Intro sheet
Sheet	Comments and explication
Daily arrivals, pelagic AMD	considers only items from quantitative samplings
Daily arrivals, all AMD	considers only items from quantitative samplings
All AMD, daily, Choros Days 7-9	quantitative sampling in subtransects
Epibionts Anakena	items with epibionts, from quantitative samplings (quant) and additional items (add) from opportunistic sampling
Epibionts Ovahe	items with epibionts, from quantitative samplings (quant) and additional items (add) from opportunistic sampling
Epibionts MBS	items with epibionts, from quantitative samplings (quant) and additional items (add) from opportunistic sampling
Epibionts MBN	items with epibionts, from quantitative samplings (quant) and additional items (add) from opportunistic sampling
Epibionts Ritoque	items with epibionts, from quantitative samplings (quant) and additional items (add) from opportunistic sampling
Epibionts Maitencillo	items with epibionts, from quantitative samplings (quant) and additional items (add) from opportunistic sampling
Epibionts Choros	items with epibionts, from quantitative samplings (quant) and additional items (add) from opportunistic sampling
Buoyancy tests clean items	Results of buoyancy tests for items with no epibionts
Abbreviations: Litter categories
JML	JML codes from from Moralles-Caselles et al (2021). Morales-Caselles, C., Viejo, J., Martí, E. et al. An inshore–offshore sorting system revealed from global classification of ocean litter. Nat Sustain 4, 484–493 (2021). https://doi.org/10.1038/s41893-021-00720-8
UNEP	UNEP/IOC codes: Litter categories from Cheshire et al (2009). Cheshire, AC, Adler, A.Barbière, J., Cohen Y., Evans, S., Jarayabhand, S., Jeftic, L., Jung, R.T., Kinsey, S., Kusui, E.T., Lavine, I., Manyara, P., Oosterbaan, L., Pereira, M.A., Sheavly, S., Tkalin, A., Varadarajan, S., Wenneker, B., Westphalen, G. UNEP/IOC Guidelines on Survey and Monitoring of Marine Litter. UNEP Regional Seas Repo…
HPL	Hard Plastics
TPL	Thin Plastics
OPL	Other Plastics
Other, Mix	Other or not idenfiable materials and items
Ropes	Synthetic ropes and rope bundles (=entangled pieces of rope)

## Sheet: Daily arrivals, "pelagic" AMD
Day	Date	Region	Beach	Condition	Sampling section [m]	Hard plastics (HPL)	Other, mix	Other plastics (Other, PL)	Ropes	Thin plastics (TPL)		∑ items per day	∑ items per beach
1	2021-03-04	Oceanic, Rapa Nui	Anakena	pelagic	250	15	0	0	2	0		17	122
2	2021-03-05	Oceanic, Rapa Nui	Anakena	pelagic	250	11	0	0	3	0		14
3	2021-03-06	Oceanic, Rapa Nui	Anakena	pelagic	250	25	0	0	0	0		25
4	2021-03-07	Oceanic, Rapa Nui	Anakena	pelagic	250	21	0	0	1	0		22
5	2021-03-08	Oceanic, Rapa Nui	Anakena	pelagic	250	5	0	0	0	0		5
6	2021-03-09	Oceanic, Rapa Nui	Anakena	pelagic	250	12	0	0	0	0		12
7	2021-03-10	Oceanic, Rapa Nui	Anakena	pelagic	250	10	0	0	1	0		11
8	2021-03-11	Oceanic, Rapa Nui	Anakena	pelagic	250	7	0	0	2	0		9
9	2021-03-12	Oceanic, Rapa Nui	Anakena	pelagic	250	4	0	0	0	0		4
10	2021-03-13	Oceanic, Rapa Nui	Anakena	pelagic	250	3	0	0	0	0		3
1	2021-03-04	Oceanic, Rapa Nui	Ovahe	pelagic	80	3	0	0	0	0		3	35
2	2021-03-05	Oceanic, Rapa Nui	Ovahe	pelagic	80	0	0	0	0	0		0
3	2021-03-06	Oceanic, Rapa Nui	Ovahe	pelagic	80	6	0	0	0	0		6
4	2021-03-07	Oceanic, Rapa Nui	Ovahe	pelagic	80	5	0	0	0	0		5
5	2021-03-08	Oceanic, Rapa Nui	Ovahe	pelagic	80	1	0	0	0	0		1
6	2021-03-09	Oceanic, Rapa Nui	Ovahe	pelagic	80	5	0	0	0	0		5
7	2021-03-10	Oceanic, Rapa Nui	Ovahe	pelagic	80	1	0	0	0	0		1
8	2021-03-11	Oceanic, Rapa Nui	Ovahe	pelagic	80	5	0	0	0	0		5
9	2021-03-12	Oceanic, Rapa Nui	Ovahe	pelagic	80	7	0	0	0	0		7
10	2021-03-13	Oceanic, Rapa Nui	Ovahe	pelagic	80	2	0	0	0	0		2
1	2021-05-07	Continental, South	Mar Brava South	pelagic	1000	0	1	0	0	0		1	2
2	2021-05-08	Continental, South	Mar Brava South	pelagic	1000	0	0	0	0	0		0
3	2021-05-09	Continental, South	Mar Brava South	pelagic	1000	0	0	0	0	0		0
4	2021-05-10	Continental, South	Mar Brava South	pelagic	1000	0	0	0	0	0		0
5	2021-05-11	Continental, South	Mar Brava South	pelagic	1000	0	0	0	0	0		0
6	2021-05-12	Continental, South	Mar Brava South	pelagic	1000	0	0	0	0	0		0
7	2021-05-13	Continental, South	Mar Brava South	pelagic	1000	0	0	0	0	0		0
8	2021-05-14	Continental, South	Mar Brava South	pelagic	1000	0	0	0	0	0		0
9	2021-05-15	Continental, South	Mar Brava South	pelagic	1000	1	0	0	0	0		1
10	2021-05-16	Continental, South	Mar Brava South	pelagic	1000	0	0	0	0	0		0
11	2021-05-17	Continental, South	Mar Brava South	pelagic	1000	0	0	0	0	0		0
12	2021-05-18	Continental, South	Mar Brava South	pelagic	1000	0	0	0	0	0		0
1	2021-05-07	Continental, South	Mar Brava North	pelagic	1000	0	0	0	1	0		1	4
2	2021-05-08	Continental, South	Mar Brava North	pelagic	1000	0	0	0	1	0		1
3	2021-05-09	Continental, South	Mar Brava North	pelagic	1000	0	0	0	0	0		0
4	2021-05-10	Continental, South	Mar Brava North	pelagic	1000	0	0	0	0	0		0
5	2021-05-11	Continental, South	Mar Brava North	pelagic	1000	0	0	0	0	0		0
6	2021-05-12	Continental, South	Mar Brava North	pelagic	1000	0	0	0	0	0		0
7	2021-05-13	Continental, South	Mar Brava North	pelagic	1000	0	1	0	0	0		1
8	2021-05-14	Continental, South	Mar Brava North	pelagic	1000	0	0	0	0	0		0
9	2021-05-15	Continental, South	Mar Brava North	pelagic	1000	1	0	0	0	0		1
10	2021-05-16	Continental, South	Mar Brava North	pelagic	1000	0	0	0	0	0		0
11	2021-05-17	Continental, South	Mar Brava North	pelagic	1000	0	0	0	0	0		0
12	2021-05-18	Continental, South	Mar Brava North	pelagic	1000	0	0	0	0	0		0
1	2021-04-21	Continental, Center	Ritoque	pelagic	1000	0	0	0	1	0		1	67
2	2021-04-22	Continental, Center	Ritoque	pelagic	1000	0	0	0	0	0		0
3	2021-04-23	Continental, Center	Ritoque	pelagic	1000	0	1	0	0	0		1
4	2021-04-24	Continental, Center	Ritoque	pelagic	1000	1	0	0	0	1		2
5	2021-04-25	Continental, Center	Ritoque	pelagic	1000	1	0	0	0	1		2
6	2021-04-26	Continental, Center	Ritoque	pelagic	1000	0	0	0	0	1		1
7	2021-04-27	Continental, Center	Ritoque	pelagic	1000	0	0	0	0	2		2
8	2021-04-28	Continental, Center	Ritoque	pelagic	1000	1	0	2	0	0		3
9	2021-04-29	Continental, Center	Ritoque	pelagic	1000	5	1	0	1	8		15
10	2021-04-30	Continental, Center	Ritoque	pelagic	1000	3	0	0	2	14		19
11	2021-05-01	Continental, Center	Ritoque	pelagic	500	5	0	1	0	3		9
12	2021-05-02	Continental, Center	Ritoque	pelagic	500	6	1	2	0	3		12
1	2021-04-21	Continental, Center	Maitencillo	pelagic	1000	0	0	0	0	0		0	9
2	2021-04-22	Continental, Center	Maitencillo	pelagic	1000	0	0	0	0	0		0
3	2021-04-23	Continental, Center	Maitencillo	pelagic	1000	1	0	0	1	0		2
4	2021-04-24	Continental, Center	Maitencillo	pelagic	1000	0	0	0	0	0		0
5	2021-04-25	Continental, Center	Maitencillo	pelagic	1000	0	0	0	0	1		1
6	2021-04-26	Continental, Center	Maitencillo	pelagic	1000	0	0	0	0	0		0
7	2021-04-27	Continental, Center	Maitencillo	pelagic	1000	1	0	0	0	2		3
8	2021-04-28	Continental, Center	Maitencillo	pelagic	1000	0	0	0	0	1		1
9	2021-04-29	Continental, Center	Maitencillo	pelagic	1000	0	0	0	0	0		0
10	2021-04-30	Continental, Center	Maitencillo	pelagic	1000	1	0	0	0	0		1
11	2021-05-01	Continental, Center	Maitencillo	pelagic	500	0	0	0	1	0		1
12	2021-05-02	Continental, Center	Maitencillo	pelagic	500	0	0	0	0	0		0
1	2021-03-16	Continental, North	Choros	pelagic	1000	0	0	0	0	0		0	0
2	2021-03-17	Continental, North	Choros	pelagic	1000	0	0	0	0	0		0
3	2021-03-18	Continental, North	Choros	pelagic	1000	0	0	0	0	0		0
4	2021-03-19	Continental, North	Choros	pelagic	1000	0	0	0	0	0		0
5	2021-03-20	Continental, North	Choros	pelagic	1000	0	0	0	0	0		0
6	2021-03-21	Continental, North	Choros	pelagic	1000	0	0	0	0	0		0
7	2021-03-22	Continental, North	Choros	pelagic	subsampled	0	0	0	0	0		0
8	2021-03-23	Continental, North	Choros	pelagic	subsampled	0	0	0	0	0		0
9	2021-03-24	Continental, North	Choros	pelagic	subsampled	0	0	0	0	0		0
10	2021-03-25	Continental, North	Choros	pelagic	1000	0	0	0	0	0		0
11	2021-03-26	Continental, North	Choros	pelagic	1000	0	0	0	0	0		0
12	2021-03-27	Continental, North	Choros	pelagic	1000	0	0	0	0	0		0

## Sheet: Daily arrivals, all AMD
Day	Date	Region	Beach	Condition	Sampling section [m]	Hard plastics (HPL)	Other, mix	Other plastics (Other, PL)	Ropes	Thin plastics (TPL)		∑ items per day	∑ items per beach
1	2021-03-04	Oceanic, Rapa Nui	Anakena	All AMD	250	33.3333	6.66667	0	46.6667	3.33333		90	499
2	2021-03-05	Oceanic, Rapa Nui	Anakena	All AMD	250	24.4286	0	0	32.5714	0		57
3	2021-03-06	Oceanic, Rapa Nui	Anakena	All AMD	250	60.8571	0	0	8.11429	2.02857		71
4	2021-03-07	Oceanic, Rapa Nui	Anakena	All AMD	250	40.8462	0	0	18.1538	0		59
5	2021-03-08	Oceanic, Rapa Nui	Anakena	All AMD	250	16	0	0	32	0		48
6	2021-03-09	Oceanic, Rapa Nui	Anakena	All AMD	250	40.5	0	0	13.5	0		54
7	2021-03-10	Oceanic, Rapa Nui	Anakena	All AMD	250	39.1667	0	0	7.83333	0		47
8	2021-03-11	Oceanic, Rapa Nui	Anakena	All AMD	250	28.5714	0	0	11.4286	0		40
9	2021-03-12	Oceanic, Rapa Nui	Anakena	All AMD	250	7.33333	0	0	3.66667	0		11
10	2021-03-13	Oceanic, Rapa Nui	Anakena	All AMD	250	14.6667	0	0	7.33333	0		22
1	2021-03-04	Oceanic, Rapa Nui	Ovahe	All AMD	80	15.3	0	0	10.8	0.9		27	240
2	2021-03-05	Oceanic, Rapa Nui	Ovahe	All AMD	80	4.29825	0	0	2.21053	0.491228		7
3	2021-03-06	Oceanic, Rapa Nui	Ovahe	All AMD	80	25.8592	0	0	7.1831	0.957746		34
4	2021-03-07	Oceanic, Rapa Nui	Ovahe	All AMD	80	21.1525	0	0	3.52542	1.32203		26
5	2021-03-08	Oceanic, Rapa Nui	Ovahe	All AMD	80	3.875	0	0	2	0.125		6
6	2021-03-09	Oceanic, Rapa Nui	Ovahe	All AMD	80	26.6667	0	0	12.5926	0.740741		40
7	2021-03-10	Oceanic, Rapa Nui	Ovahe	All AMD	80	22.9787	0.638298	0	6.38298	0		30
8	2021-03-11	Oceanic, Rapa Nui	Ovahe	All AMD	80	21.7	0	0	5.6	0.7		28
9	2021-03-12	Oceanic, Rapa Nui	Ovahe	All AMD	80	27.2727	0	0	2.72727	0		30
10	2021-03-13	Oceanic, Rapa Nui	Ovahe	All AMD	80	6.54545	0	0	5.45455	0		12
1	2021-05-07	Continental, South	Mar Brava South	All AMD	1000	6	1	3	48	47		105	887
2	2021-05-08	Continental, South	Mar Brava South	All AMD	1000	18	0	2	75	42		137
3	2021-05-09	Continental, South	Mar Brava South	All AMD	1000	16	1	7	93	29		146
4	2021-05-10	Continental, South	Mar Brava South	All AMD	1000	2	1	1	33	24		61
5	2021-05-11	Continental, South	Mar Brava South	All AMD	1000	3	1	2	15	18		39
6	2021-05-12	Continental, South	Mar Brava South	All AMD	1000	5	0	5	44	30		84
7	2021-05-13	Continental, South	Mar Brava South	All AMD	1000	7	1	3	49	6		66
8	2021-05-14	Continental, South	Mar Brava South	All AMD	1000	3	3	3	18	6		33
9	2021-05-15	Continental, South	Mar Brava South	All AMD	1000	4	2	3	16	5		30
10	2021-05-16	Continental, South	Mar Brava South	All AMD	1000	7	1	3	17	35		63
11	2021-05-17	Continental, South	Mar Brava South	All AMD	1000	0	1	3	34	10		48
12	2021-05-18	Continental, South	Mar Brava South	All AMD	1000	11	4	4	40	16		75
1	2021-05-07	Continental, South	Mar Brava North	All AMD	1000	4	4	6	20	16		50	449
2	2021-05-08	Continental, South	Mar Brava North	All AMD	1000	5	50	4	14	7		80
3	2021-05-09	Continental, South	Mar Brava North	All AMD	1000	4	5	1	11	4		25
4	2021-05-10	Continental, South	Mar Brava North	All AMD	1000	4	9	4	18	10		45
5	2021-05-11	Continental, South	Mar Brava North	All AMD	1000	12	4	5	42	13		76
6	2021-05-12	Continental, South	Mar Brava North	All AMD	1000	5	1	0	17	4		27
7	2021-05-13	Continental, South	Mar Brava North	All AMD	1000	5	1	6	27	4		43
8	2021-05-14	Continental, South	Mar Brava North	All AMD	1000	7	1	3	12	2		25
9	2021-05-15	Continental, South	Mar Brava North	All AMD	1000	10	0	4	8	4		26
10	2021-05-16	Continental, South	Mar Brava North	All AMD	1000	2	0	3	12	3		20
11	2021-05-17	Continental, South	Mar Brava North	All AMD	1000	4	0	0	11	1		16
12	2021-05-18	Continental, South	Mar Brava North	All AMD	1000	1	1	2	8	4		16
1	2021-04-21	Continental, Center	Ritoque	All AMD	1000	1.03963	1.03963	31	9.45122	81.4695		124	5677
2	2021-04-22	Continental, Center	Ritoque	All AMD	1000	81.3039	0.805654	21.2827	0	10.6078		114
3	2021-04-23	Continental, Center	Ritoque	All AMD	1000	1.23868	13.9007	29.0401	0.275261	34.5453		79
4	2021-04-24	Continental, Center	Ritoque	All AMD	1000	15.3164	5.24115	10.4823	5.24115	32.719		69
5	2021-04-25	Continental, Center	Ritoque	All AMD	1000	21.7919	0.284861	7.54883	7.33518	130.039		167
6	2021-04-26	Continental, Center	Ritoque	All AMD	1000	7.68745	0.34251	7.80162	0	78.1684		94
7	2021-04-27	Continental, Center	Ritoque	All AMD	1000	133.271	68.1286	66.5	7.05714	352.043		627
8	2021-04-28	Continental, Center	Ritoque	All AMD	1000	790.949	111.204	96.0667	21.8333	682.947		1703
9	2021-04-29	Continental, Center	Ritoque	All AMD	1000	286.615	38.0518	50.3094	24.6218	663.402		1063
10	2021-04-30	Continental, Center	Ritoque	All AMD	1000	239.158	16.6708	47.601	33.6562	752.914		1090
11	2021-05-01	Continental, Center	Ritoque	All AMD	500	91.6689	1.80079	47.1636	9.34697	175.02		325
12	2021-05-02	Continental, Center	Ritoque	All AMD	500	59.2124	7.17726	26.2341	1.3612	128.015		222
1	2021-04-21	Continental, Center	Maitencillo	All AMD	1000	12	5	3	0	11		31	2758
2	2021-04-22	Continental, Center	Maitencillo	All AMD	1000	41	40	18	10	160		269
3	2021-04-23	Continental, Center	Maitencillo	All AMD	1000	6	4	5	5	110		130
4	2021-04-24	Continental, Center	Maitencillo	All AMD	1000	3	4	2	7	77		93
5	2021-04-25	Continental, Center	Maitencillo	All AMD	1000	14	4	7	11	51		87
6	2021-04-26	Continental, Center	Maitencillo	All AMD	1000	14	1	5	2	34		56
7	2021-04-27	Continental, Center	Maitencillo	All AMD	1000	1	3	1	2	13		20
8	2021-04-28	Continental, Center	Maitencillo	All AMD	1000	222	184	88	22	457		973
9	2021-04-29	Continental, Center	Maitencillo	All AMD	1000	108	106	28	16	270		528
10	2021-04-30	Continental, Center	Maitencillo	All AMD	1000	58	32	24	11	145		270
11	2021-05-01	Continental, Center	Maitencillo	All AMD	500	25	20	2	9	114		170
12	2021-05-02	Continental, Center	Maitencillo	All AMD	500	22	6	8	4	91		131
1	2021-03-16	Continental, North	Choros	All AMD	1000	20	0	9	14	25		68	949
2	2021-03-17	Continental, North	Choros	All AMD	1000	26	2	13	24	29		94
3	2021-03-18	Continental, North	Choros	All AMD	1000	9.14286	9.14286	30.4762	39.619	39.619		128
4	2021-03-19	Continental, North	Choros	All AMD	1000	3.14754	1.04918	12.5902	23.082	24.1311		64
5	2021-03-20	Continental, North	Choros	All AMD	1000	12.3243	8.21622	16.4324	20.5405	18.4865		76
6	2021-03-21	Continental, North	Choros	All AMD	1000	3.83158	6.70526	28.7368	19.1579	32.5684		91
7	2021-03-22	Continental, North	Choros	All AMD	subsampled, see next sheet	3	18	36	55	41		153
8	2021-03-23	Continental, North	Choros	All AMD	subsampled, see next sheet	1	17	19	41	30		108
9	2021-03-24	Continental, North	Choros	All AMD	subsampled, see next sheet	1	11	16	59	26		113
10	2021-03-25	Continental, North	Choros	All AMD	1000	0	4	2	2	1		9
11	2021-03-26	Continental, North	Choros	All AMD	1000	0	4	3	7	4		18
12	2021-03-27	Continental, North	Choros	All AMD	1000	0	2	8	9	8		27

## Sheet: All AMD, daily, Choros Days 7-9
absolute values
Beach	Day	Date	Subsection	Length [m]	Representative of [m]	HPL	Other, Mix	Other, PL	Ropes	TPL		∑
Choros	7	2021-03-22	1	700	700	2	17	28	26	26		26
			2	20	300	1	1	1	14	5		14
			3	20		0	0	3	3	2		3
			4	20		0	0	4	12	8		12
	8	2021-03-23	1	700	700	0	9	10	24	17		24
			2	20	300	0	5	4	5	7		5
			3	20		0	1	1	6	4		6
			4	20		1	2	4	6	2		6
	9	2021-03-24	1	925	925	0	0	0	0	0		0
			2	5	75	0	2	1	8	7		8
			3	5		0	3	7	18	5		18
			4	5		1	6	8	33	14		33
per km
Choros	Day	Date	Subsection	Length [m]	Representative of [m]							∑
	7	2021-03-22	all	1000	1000	7	22	68	171	101		369
	8	2021-03-23	all	1000	1000	5	49	55	109	82		300
	9	2021-03-24	all	1000	1000	5	55	80	295	130		565

## Sheet: Epibionts Anakena
Beach	Day	Date	quant/add	Raft ID	Main category	Subcategory	Description	JML	UNEP	floats?	∑ species	Lepas anatifera	Lepas sp.	Jellyella sp.	Hydroids, ni	Coral/Pocillopora sp.	Spirorbinae, ni	Oyster, ni	Calcareous bacteria (?)
Anakena	0	2021-03-03	add	1	HPL	HPL caps and lids	Bottle cap	AG20	PL01	yes	1			1
Anakena	0	2021-03-02	add	1	HPL	HPL fragments, not PET	HPL fragment	AG79	PL24	yes	1			1
Anakena	0	2021-03-02	add	2	HPL	HPL fragments, not PET	HPL fragment	AG79	PL24	yes	1			1
Anakena	0	2021-03-03	add	2	HPL	HPL fragments, not PET	HPL fragment	AG79	PL24	yes	1			1
Anakena	0	2021-03-02	add	3	HPL	HPL fragments, not PET	HPL fragment	AG79	PL24	yes	1			1
Anakena	0	2021-03-03	add	3	HPL	HPL fragments, not PET	HPL fragment	AG79	PL24	yes	1			1
Anakena	0	2021-03-03	add	4	HPL	HPL caps and lids	Bottle cap	AG20	PL01	yes	1			1
Anakena	0	2021-03-02	add	4	HPL	HPL fragments, not PET	HPL fragment	AG79	PL24	yes	1			1
Anakena	0	2021-03-03	add	5	HPL	HPL fragments, not PET	HPL fragment	AG79	PL24	yes	1			1
Anakena	0	2021-03-03	add	6	HPL	HPL fragments, not PET	HPL fragment	AG79	PL24	yes	2			1	1
Anakena	0	2021-03-03	add	7	HPL	HPL fragments, not PET	HPL fragment	AG79	PL24	yes	1			1
Anakena	0	2021-03-03	add	8	HPL	HPL fragments, not PET	HPL fragment	AG79	PL24	yes	1			1
Anakena	1	2021-03-04	quant	1	HPL	HPL fragments, not PET	HPL fragment	AG79	PL24	yes	1			1
Anakena	1	2021-03-04	quant	2	HPL	HPL fragments, not PET	HPL fragment	AG79	PL24	yes	3		1	1	1
Anakena	1	2021-03-04	quant	3	HPL	HPL caps and lids	Bottle cap	AG20	PL01	yes	1			1
Anakena	1	2021-03-04	quant	4	HPL	HPL fragments, not PET	HPL fragment	AG79	PL24	yes	1			1
Anakena	1	2021-03-04	quant	5	Ropes	Ropes and rope bundles, synthetic	Rope fragment	AG48	PL19	yes	1			1
Anakena	1	2021-03-04	quant	6	HPL	HPL fragments, not PET	HPL fragment	AG79	PL24	yes	1			1
Anakena	1	2021-03-04	quant	7	HPL	HPL fragments, not PET	HPL fragment	AG79	PL24	yes	1			1
Anakena	1	2021-03-04	quant	8	HPL	HPL caps and lids	Bottle cap	AG20	PL01	yes	1			1
Anakena	1	2021-03-04	quant	9	Ropes	Ropes and rope bundles, synthetic	Rope fragment	AG48	PL19	yes	2			1	1
Anakena	1	2021-03-04	quant	10	HPL	HPL fragments, not PET	HPL fragment	AG79	PL24	yes	2		1	1
Anakena	1	2021-03-04	quant	11	HPL	HPL fragments, not PET	HPL fragment	AG79	PL24	yes	1			1
Anakena	1	2021-03-04	quant	12	HPL	HPL fragments, not PET	HPL fragment	AG79	PL24	yes	1			1
Anakena	1	2021-03-04	quant	13	HPL	HPL fragments, not PET	HPL fragment	AG79	PL24	yes	1			1
Anakena	1	2021-03-04	quant	14	HPL	HPL fragments, not PET	HPL fragment	AG79	PL24	yes	2		1	1
Anakena	1	2021-03-04	quant	15	HPL	HPL fragments, not PET	HPL fragment	AG79	PL24	yes	1			1
Anakena	1	2021-03-04	quant	16	HPL	HPL fragments, not PET	HPL fragment	AG79	PL24	yes	1			1
Anakena	1	2021-03-04	quant	17	HPL	HPL fragments, not PET	HPL fragment	AG79	PL24	yes	1			1
Anakena	2	2021-03-05	quant	1	HPL	HPL fragments, not PET	HPL fragment	AG79	PL24	yes	2			1	1
Anakena	2	2021-03-05	quant	2	HPL	HPL fragments, not PET	HPL fragment	AG79	PL24	yes	1			1
Anakena	2	2021-03-05	quant	3	HPL	HPL fragments, not PET	HPL fragment	AG79	PL24	yes	1			1
Anakena	2	2021-03-05	quant	4	HPL	HPL fragments, not PET	HPL fragment	AG79	PL24	yes	1			1
Anakena	2	2021-03-05	quant	5	Ropes	Ropes and rope bundles, synthetic	Rope fragment	AG48	PL19	yes	1			1
Anakena	2	2021-03-05	quant	6	HPL	HPL fragments, not PET	HPL fragment	AG79	PL24	yes	1			1
Anakena	2	2021-03-05	quant	7	Ropes	Ropes and rope bundles, synthetic	Rope fragment	AG48	PL19	yes	2		1	1
Anakena	2	2021-03-05	quant	8	Ropes	Ropes and rope bundles, synthetic	Rope fragment	AG48	PL19	yes	1				1
Anakena	2	2021-03-05	quant	9	HPL	HPL fragments, not PET	HPL fragment	AG79	PL24	yes	2		1	1
Anakena	2	2021-03-05	quant	10	HPL	HPL fragments, not PET	HPL fragment	AG79	PL24	yes	1			1
Anakena	2	2021-03-05	quant	11	HPL	HPL fragments, not PET	HPL fragment	AG79	PL24	yes	1			1
Anakena	2	2021-03-05	quant	12	HPL	HPL fragments, not PET	HPL fragment	AG79	PL24	yes	1			1
Anakena	2	2021-03-05	quant	13	Ropes	Ropes and rope bundles, synthetic	Rope fragment	AG48	PL19	yes	1			1
Anakena	2	2021-03-05	quant	14	HPL	HPL fragments, not PET	HPL fragment	AG79	PL24	yes	1			1
Anakena	2	2021-03-05	quant	15	HPL	HPL fragments, not PET	HPL fragment	AG79	PL24	yes	1			1
Anakena	3	2021-03-06	quant	1	HPL	HPL fragments, not PET	HPL fragment	AG79	PL24	yes	1			1
Anakena	3	2021-03-06	quant	2	HPL	HPL fragments, not PET	HPL fragment	AG79	PL24	yes	1			1
Anakena	3	2021-03-06	quant	3	HPL	HPL fragments, not PET	HPL fragment	AG79	PL24	yes	1			1
Anakena	3	2021-03-06	quant	4	HPL	HPL fragments, not PET	HPL fragment	AG79	PL24	yes	2			1	1
Anakena	3	2021-03-06	quant	5	HPL	HPL fragments, not PET	HPL fragment	AG79	PL24	yes	1			1
Anakena	3	2021-03-06	quant	6	HPL	HPL fragments, not PET	HPL fragment	AG79	PL24	yes	1			1
Anakena	3	2021-03-06	quant	7	HPL	HPL fragments, not PET	HPL fragment	AG79	PL24	yes	1			1
Anakena	3	2021-03-06	quant	8	HPL	HPL fragments, not PET	HPL fragment	AG79	PL24	yes	1			1
Anakena	3	2021-03-06	quant	9	HPL	HPL fragments, not PET	HPL fragment	AG79	PL24	yes	1			1
Anakena	3	2021-03-06	quant	10	HPL	HPL fragments, not PET	HPL fragment	AG79	PL24	yes	1			1
Anakena	3	2021-03-06	quant	11	HPL	HPL fragments, not PET	HPL fragment	AG79	PL24	yes	1			1
Anakena	3	2021-03-06	quant	12	HPL	HPL fragments, not PET	HPL fragment	AG79	PL24	yes	1			1
Anakena	3	2021-03-06	quant	13	HPL	HPL fragments, not PET	HPL fragment	AG79	PL24	yes	1			1
Anakena	3	2021-03-06	quant	14	HPL	HPL fragments, not PET	HPL fragment	AG79	PL24	yes	1			1
Anakena	3	2021-03-06	quant	15	HPL	HPL fragments, not PET	HPL fragment	AG79	PL24	yes	1			1
Anakena	3	2021-03-06	quant	16	HPL	HPL fragments, not PET	HPL fragment	AG79	PL24	yes	1			1
Anakena	3	2021-03-06	quant	17	HPL	HPL fragments, not PET	HPL fragment	AG79	PL24	yes	1			1
Anakena	3	2021-03-06	quant	18	HPL	HPL fragments, not PET	HPL fragment	AG79	PL24	yes	2			1	1
Anakena	3	2021-03-06	quant	19	HPL	HPL fragments, not PET	HPL fragment	AG79	PL24	yes	1			1
Anakena	3	2021-03-06	quant	20	HPL	HPL fragments, not PET	HPL fragment	AG79	PL24	yes	1			1
Anakena	3	2021-03-06	quant	21	HPL	HPL fragments, not PET	HPL fragment	AG79	PL24	yes	1			1
Anakena	3	2021-03-06	quant	22	HPL	HPL fragments, not PET	HPL fragment	AG79	PL24	yes	1			1
Anakena	3	2021-03-06	quant	23	HPL	HPL fragments, not PET	HPL fragment	AG79	PL24	yes	1			1
Anakena	3	2021-03-06	quant	24	HPL	HPL fragments, not PET	HPL fragment	AG79	PL24	yes	1			1
Anakena	3	2021-03-06	quant	26	HPL	HPL fragments, not PET	HPL fragment	AG79	PL24	yes	1	1
Anakena	4	2021-03-07	quant	1	HPL	HPL fragments, not PET	HPL fragment	AG79	PL24	nd	1			1
Anakena	4	2021-03-07	quant	2	HPL	HPL fragments, not PET	HPL fragment	AG79	PL24	nd	1			1
Anakena	4	2021-03-07	quant	3	HPL	HPL fragments, not PET	HPL fragment	AG79	PL24	nd	1			1
Anakena	4	2021-03-07	quant	4	HPL	HPL fragments, not PET	HPL fragment	AG79	PL24	nd	1			1
Anakena	4	2021-03-07	quant	5	HPL	HPL fragments, not PET	HPL fragment	AG79	PL24	nd	1			1
Anakena	4	2021-03-07	quant	6	HPL	HPL fragments, not PET	HPL fragment	AG79	PL24	nd	1			1
Anakena	4	2021-03-07	quant	7	HPL	HPL fragments, not PET	HPL fragment	AG79	PL24	nd	1			1
Anakena	4	2021-03-07	quant	8	HPL	HPL fragments, not PET	HPL fragment	AG79	PL24	nd	1			1
Anakena	4	2021-03-07	quant	9	HPL	HPL fragments, not PET	HPL fragment	AG79	PL24	nd	1			1
Anakena	4	2021-03-07	quant	10	HPL	HPL fragments, not PET	HPL fragment	AG79	PL24	nd	1			1
Anakena	4	2021-03-07	quant	11	HPL	HPL fragments, not PET	HPL fragment	AG79	PL24	nd	1			1
Anakena	4	2021-03-07	quant	12	HPL	HPL fragments, not PET	HPL fragment	AG79	PL24	nd	1			1
Anakena	4	2021-03-07	quant	13	HPL	HPL fragments, not PET	HPL fragment	AG79	PL24	nd	1			1
Anakena	4	2021-03-07	quant	14	HPL	HPL fragments, not PET	HPL fragment	AG79	PL24	nd	1			1
Anakena	4	2021-03-07	quant	15	HPL	HPL fragments, not PET	HPL fragment	AG79	PL24	nd	1			1
Anakena	4	2021-03-07	quant	16	HPL	HPL fragments, not PET	HPL fragment	AG79	PL24	nd	1			1
Anakena	4	2021-03-07	quant	17	HPL	HPL fragments, not PET	HPL fragment	AG79	PL24	nd	1			1
Anakena	4	2021-03-07	quant	18	HPL	HPL fragments, not PET	HPL fragment	AG79	PL24	nd	1			1
Anakena	4	2021-03-07	quant	19	HPL	HPL caps and lids	Bottle cap	AG20	PL01	yes	3	1		1	1
Anakena	4	2021-03-07	quant	20	HPL	HPL caps and lids	Bottle cap	AG20	PL01	nd	1			1
Anakena	4	2021-03-07	quant	21	HPL	HPL caps and lids	Bottle cap	AG20	PL01	nd	1			1
Anakena	4	2021-03-07	quant	23	Ropes	Ropes and rope bundles, synthetic	Rope fragment	AG48	PL19	yes	2		1	1
Anakena	5	2021-03-08	quant	1	HPL	HPL fragments, not PET	HPL fragment	AG79	PL24	nd	1			1
Anakena	5	2021-03-08	quant	2	HPL	HPL fragments, not PET	HPL fragment	AG79	PL24	nd	1			1
Anakena	5	2021-03-08	quant	3	HPL	HPL fragments, not PET	HPL fragment	AG79	PL24	nd	1			1
Anakena	5	2021-03-08	quant	4	HPL	HPL fragments, not PET	HPL fragment	AG79	PL24	nd	1			1
Anakena	5	2021-03-08	quant	5	HPL	HPL fragments, not PET	HPL fragment	AG79	PL24	nd	1			1
Anakena	5	2021-03-08	quant	6	Ropes	Ropes and rope bundles, synthetic	Rope fragment	AG48	PL19	yes	1				1
Anakena	5	2021-03-08	quant	7	Ropes	Ropes and rope bundles, synthetic	Rope fragment	AG48	PL19	yes	2					1		1
Anakena	6	2021-03-09	quant	1	HPL	HPL fragments, not PET	HPL fragment	AG79	PL24	nd	1			1
Anakena	6	2021-03-09	quant	2	HPL	HPL fragments, not PET	HPL fragment	AG79	PL24	nd	1			1
Anakena	6	2021-03-09	quant	3	HPL	HPL fragments, not PET	HPL fragment	AG79	PL24	nd	1			1
Anakena	6	2021-03-09	quant	4	HPL	HPL fragments, not PET	HPL fragment	AG79	PL24	nd	1			1
Anakena	6	2021-03-09	quant	5	HPL	HPL fragments, not PET	HPL fragment	AG79	PL24	nd	1			1
Anakena	6	2021-03-09	quant	6	HPL	HPL fragments, not PET	HPL fragment	AG79	PL24	nd	1			1
Anakena	6	2021-03-09	quant	7	HPL	HPL fragments, not PET	HPL fragment	AG79	PL24	nd	1			1
Anakena	6	2021-03-09	quant	8	HPL	HPL fragments, not PET	HPL fragment	AG79	PL24	nd	1			1
Anakena	6	2021-03-09	quant	9	HPL	HPL fragments, not PET	HPL fragment	AG79	PL24	nd	1			1
Anakena	6	2021-03-09	quant	10	HPL	HPL fragments, not PET	HPL fragment	AG79	PL24	nd	1			1
Anakena	6	2021-03-09	quant	11	HPL	HPL fragments, not PET	HPL fragment	AG79	PL24	nd	1			1
Anakena	6	2021-03-09	quant	12	HPL	HPL fragments, not PET	HPL fragment	AG79	PL24	yes	1		1
Anakena	6	2021-03-09	quant	13	Ropes	Ropes and rope bundles, synthetic	Rope fragment	AG48	PL19	yes	1				1
Anakena	7	2021-03-10	quant	1	HPL	HPL fragments, not PET	HPL fragment	AG79	PL24	yes	1			1
Anakena	7	2021-03-10	quant	2	HPL	HPL fragments, not PET	HPL fragment	AG79	PL24	yes	2						1		1
Anakena	7	2021-03-10	quant	3	HPL	HPL fragments, not PET	HPL fragment	AG79	PL24	yes	1			1
Anakena	7	2021-03-10	quant	4	HPL	HPL fragments, not PET	HPL fragment	AG79	PL24	yes	1			1
Anakena	7	2021-03-10	quant	5	HPL	HPL fragments, not PET	HPL fragment	AG79	PL24	yes	1			1
Anakena	7	2021-03-10	quant	6	HPL	HPL fragments, not PET	HPL fragment	AG79	PL24	yes	1			1
Anakena	7	2021-03-10	quant	7	HPL	HPL fragments, not PET	HPL fragment	AG79	PL24	yes	1			1
Anakena	7	2021-03-10	quant	8	HPL	HPL fragments, not PET	HPL fragment	AG79	PL24	yes	1			1
Anakena	7	2021-03-10	quant	9	HPL	HPL fragments, not PET	HPL fragment	AG79	PL24	yes	1			1
Anakena	7	2021-03-10	quant	10	HPL	HPL fragments, not PET	HPL fragment	AG79	PL24	yes	1			1
Anakena	7	2021-03-10	quant	11	HPL	HPL caps and lids	Bottle cap	AG20	PL01	yes	1			1
Anakena	7	2021-03-10	quant	12	Ropes	Ropes and rope bundles, synthetic	Rope fragment	AG48	PL19	yes	1					1
Anakena	7	2021-03-10	quant	13	Ropes	Ropes and rope bundles, synthetic	Rope fragment	AG48	PL19	yes	1			1
Anakena	8	2021-03-11	quant	1	HPL	HPL fragments, not PET	HPL fragment	AG79	PL24	yes	1			1
Anakena	8	2021-03-11	quant	2	HPL	HPL fragments, not PET	HPL fragment	AG79	PL24	yes	2			1		1
Anakena	8	2021-03-11	quant	3	HPL	HPL fragments, not PET	HPL fragment	AG79	PL24	nd	1			1
Anakena	8	2021-03-11	quant	4	HPL	HPL fragments, not PET	HPL fragment	AG79	PL24	yes	1			1
Anakena	8	2021-03-11	quant	5	HPL	HPL fragments, not PET	HPL fragment	AG79	PL24	yes	1			1
Anakena	8	2021-03-11	quant	6	HPL	HPL fragments, not PET	HPL fragment	AG79	PL24	yes	1			1
Anakena	8	2021-03-11	quant	7	HPL	HPL fragments, not PET	HPL fragment	AG79	PL24	yes	1			1
Anakena	8	2021-03-11	quant	8	HPL	HPL fragments, not PET	HPL fragment	AG79	PL24	yes	1								1
Anakena	8	2021-03-11	quant	9	Ropes	HPL fragments, not PET	HPL fragment	AG79	PL24	yes	3			1	1	1
Anakena	8	2021-03-11	quant	10	Ropes	Ropes and rope bundles, synthetic	Rope fragment	AG48	PL19	yes	2			1	1
Anakena	9	2021-03-12	quant	1	HPL	HPL fragments, not PET	HPL fragment	AG79	PL24	yes	1			1
Anakena	9	2021-03-12	quant	2	HPL	HPL fragments, not PET	HPL fragment	AG79	PL24	yes	1			1
Anakena	9	2021-03-12	quant	3	HPL	HPL fragments, not PET	HPL fragment	AG79	PL24	yes	1			1
Anakena	9	2021-03-12	quant	4	HPL	HPL fragments, not PET	HPL fragment	AG79	PL24	yes	1			1
Anakena	10	2021-03-13	quant	1	HPL	HPL fragments, not PET	HPL fragment	AG79	PL24	yes	2			1	1
Anakena	10	2021-03-13	quant	2	HPL	HPL fragments, not PET	HPL fragment	AG79	PL24	yes	1			1
Anakena	10	2021-03-13	quant	3	HPL	HPL caps and lids	Bottle cap	AG20	PL01	yes	1			1
Anakena	11	2021-03-14	add	1	HPL	HPL fragments, not PET	HPL fragment	AG79	PL24	yes	1			1
Anakena	11	2021-03-14	add	2	HPL	HPL fragments, not PET	HPL fragment	AG79	PL24	yes	1			1
Anakena	11	2021-03-14	add	3	HPL	HPL fragments, not PET	HPL fragment	AG79	PL24	yes	2		1	1
Anakena	12	2021-03-15	add	1	HPL	HPL fragments, not PET	HPL fragment	AG79	PL24	yes	1			1
Anakena	12	2021-03-15	add	2	HPL	HPL fragments, not PET	HPL fragment	AG79	PL24	yes	1			1
Anakena	12	2021-03-15	add	3	HPL	HPL fragments, not PET	HPL fragment	AG79	PL24	yes	2						1		1
Anakena	12	2021-03-15	add	4	HPL	HPL fragments, not PET	HPL fragment	AG79	PL24	yes	1			1
										Average	1.15541
										St.Dev	0.415889

## Sheet: Epibionts Ovahe
Beach	Day	Date	quant/add	Raft ID	Main category	Subcategory	Description	JML	UNEP	floats?	∑ species	Lepas sp.	Jellyella sp.	Spirorbinae, ni	Serpulidae,not spirorbids, ni	Hydroids, ni	encrusting Bacteria (?)	other, ni sp1	other, ni sp2
Ovahe	0	2021-03-02	add	1	HPL	HPL fragments, not PET	HPL fragment	AG79	PL24	yes	1		1
Ovahe	0	2021-03-03	add	1	HPL	HPL fragments, not PET	HPL fragment	AG79	PL24	yes	1		1
Ovahe	0	2021-03-02	add	2	HPL	HPL fragments, not PET	HPL fragment	AG79	PL24	yes	1					1
Ovahe	0	2021-03-03	add	2	HPL	HPL fragments, not PET	HPL fragment	AG79	PL24	yes	1		1
Ovahe	0	2021-03-02	add	3	HPL	HPL fragments, not PET	HPL fragment	AG79	PL24	yes	2		1			1
Ovahe	0	2021-03-03	add	3	HPL	HPL fragments, not PET	HPL fragment	AG79	PL24	yes	1		1
Ovahe	0	2021-03-03	add	4	HPL	HPL fragments, not PET	HPL fragment	AG79	PL24	yes	1		1
Ovahe	0	2021-03-03	add	5	HPL	HPL fragments, not PET	HPL fragment	AG79	PL24	yes	1		1
Ovahe	0	2021-03-03	add	6	HPL	HPL fragments, not PET	HPL fragment	AG79	PL24	yes	1		1
Ovahe	1	2021-03-04	quant	1	HPL	HPL fragments, not PET	HPL fragment	AG79	PL24	yes	1		1
Ovahe	1	2021-03-04	quant	2	HPL	HPL fragments, not PET	HPL fragment	AG79	PL24	yes	1		1
Ovahe	1	2021-03-04	quant	3	HPL	HPL fragments, not PET	HPL fragment	AG79	PL24	yes	1		1
Ovahe	3	2021-03-06	quant	1	HPL	HPL fragments, not PET	HPL fragment	AG79	PL24	yes	1		1
Ovahe	3	2021-03-06	quant	2	HPL	HPL fragments, not PET	HPL fragment	AG79	PL24	yes	2	1	1
Ovahe	3	2021-03-06	quant	3	HPL	HPL fragments, not PET	HPL fragment	AG79	PL24	nd	1		1
Ovahe	3	2021-03-06	quant	4	HPL	HPL fragments, not PET	HPL fragment	AG79	PL24	nd	1		1
Ovahe	3	2021-03-06	quant	5	HPL	HPL fragments, not PET	HPL fragment	AG79	PL24	nd	1		1
Ovahe	3	2021-03-06	quant	6	HPL	HPL fragments, not PET	HPL fragment	AG79	PL24	nd	1		1
Ovahe	4	2021-03-07	quant	1	HPL	HPL fragments, not PET	HPL fragment	AG79	PL24	nd	1		1
Ovahe	4	2021-03-07	quant	2	HPL	HPL fragments, not PET	HPL fragment	AG79	PL24	nd	1		1
Ovahe	4	2021-03-07	quant	3	HPL	HPL fragments, not PET	HPL fragment	AG79	PL24	nd	1		1
Ovahe	4	2021-03-07	quant	4	HPL	HPL fragments, not PET	HPL fragment	AG79	PL24	nd	1		1
Ovahe	4	2021-03-07	quant	5	HPL	HPL fragments, not PET	HPL fragment	AG79	PL24	nd	1		1
Ovahe	5	2021-03-08	quant	1	HPL	HPL fragments, not PET	HPL fragment	AG79	PL24	nd	1		1
Ovahe	6	2021-03-09	quant	1	HPL	HPL fragments, not PET	HPL fragment	AG79	PL24	nd	1		1
Ovahe	6	2021-03-09	quant	2	HPL	HPL fragments, not PET	HPL fragment	AG79	PL24	nd	1		1
Ovahe	6	2021-03-09	quant	3	HPL	HPL fragments, not PET	HPL fragment	AG79	PL24	nd	1		1
Ovahe	6	2021-03-09	quant	4	HPL	HPL fragments, not PET	HPL fragment	AG79	PL24	nd	1		1
Ovahe	6	2021-03-09	quant	5	HPL	HPL fragments, not PET	HPL fragment	AG79	PL24	nd	1		1
Ovahe	7	2021-03-10	quant	1	HPL	HPL fragments, not PET	HPL fragment	AG79	PL24	yes	2		1			1
Ovahe	7	2021-03-10	quant	2	HPL	HPL fragments, not PET	HPL fragment	AG79	PL24	yes	3			1			1	1
Ovahe	7	2021-03-10	quant	3	HPL	HPL fragments, not PET	HPL fragment	AG79	PL24	yes	3			1			1	1
Ovahe	8	2021-03-11	quant	1	HPL	HPL fragments, not PET	HPL fragment	AG79	PL24	yes	1		1
Ovahe	8	2021-03-11	quant	2	HPL	HPL fragments, not PET	HPL fragment	AG79	PL24	yes	2		1				1
Ovahe	8	2021-03-11	quant	3	HPL	HPL fragments, not PET	HPL fragment	AG79	PL24	yes	1		1
Ovahe	8	2021-03-11	quant	4	HPL	HPL fragments, not PET	HPL fragment	AG79	PL24	yes	1		1
Ovahe	8	2021-03-11	quant	5	HPL	HPL fragments, not PET	HPL fragment	AG79	PL24	yes	1		1
Ovahe	8	2021-03-11	quant	6	HPL	HPL fragments, not PET	HPL fragment	AG79	PL24	yes	4			1	1			1	1
Ovahe	8	2021-03-11	quant	8	HPL	HPL caps and lids	Bottle cap	AG20	PL01	yes	3			1	1		1
Ovahe	9	2021-03-12	quant	1	HPL	HPL fragments, not PET	HPL fragment	AG79	PL24	yes	2		1			1
Ovahe	9	2021-03-12	quant	2	HPL	HPL fragments, not PET	HPL fragment	AG79	PL24	yes	1		1
Ovahe	9	2021-03-12	quant	3	HPL	HPL fragments, not PET	HPL fragment	AG79	PL24	yes	1		1
Ovahe	9	2021-03-12	quant	4	HPL	HPL fragments, not PET	HPL fragment	AG79	PL24	yes	1		1
Ovahe	9	2021-03-12	quant	5	HPL	HPL fragments, not PET	HPL fragment	AG79	PL24	yes	1		1
Ovahe	9	2021-03-12	quant	6	HPL	HPL fragments, not PET	HPL fragment	AG79	PL24	yes	1		1
Ovahe	9	2021-03-12	quant	7	HPL	HPL fragments, not PET	HPL fragment	AG79	PL24	yes	1		1
Ovahe	10	2021-03-13	quant	1	HPL	HPL fragments, not PET	HPL fragment	AG79	PL24	yes	1		1
Ovahe	10	2021-03-13	quant	2	HPL	HPL fragments, not PET	HPL fragment	AG79	PL24	yes	1		1
Ovahe	11	2021-03-14	add	1	HPL	HPL fragments, not PET	HPL fragment	AG79	PL24	yes	1		1
Ovahe	11	2021-03-14	add	2	HPL	HPL fragments, not PET	HPL fragment	AG79	PL24	yes	1		1
Ovahe	11	2021-03-14	add	3	HPL	HPL fragments, not PET	HPL fragment	AG79	PL24	yes	1		1
Ovahe	11	2021-03-14	add	4	HPL	HPL fragments, not PET	HPL fragment	AG79	PL24	yes	1		1
Ovahe	12	2021-03-15	add	1	HPL	HPL fragments, not PET	HPL fragment	AG79	PL24	yes	1		1
Ovahe	12	2021-03-15	add	2	HPL	HPL fragments, not PET	HPL fragment	AG79	PL24	yes	1		1
Ovahe	12	2021-03-15	add	3	HPL	HPL fragments, not PET	HPL fragment	AG79	PL24	yes	1		1
Ovahe	12	2021-03-15	add	4	HPL	HPL fragments, not PET	HPL fragment	AG79	PL24	yes	1		1
Ovahe	12	2021-03-15	add	5	HPL	HPL fragments, not PET	HPL fragment	AG79	PL24	yes	1		1
Ovahe	12	2021-03-15	add	6	HPL	HPL fragments, not PET	HPL fragment	AG79	PL24	yes	1		1
Ovahe	12	2021-03-15	add	7	HPL	HPL fragments, not PET	HPL fragment	AG79	PL24	yes	1		1
										Average	1.23729
										St.Dev	0.625299

## Sheet: Epibionts MBS
Beach	Day	Date	quant/add	Raft ID	Main Category	Subcategory	Description	JML	UNEP	floats?	∑ species	Electridae, ni	Bryozoa, encrusting, ni	Flustrina, ni	Hippothoidae, ni	Schizoporelloidae, ni	Fenestrulina sp.	Cauloramphus sp.	Exochella sp.	Chaperia sp.	Hydroids, ni	Spirorbinae ,ni	Nereididae, ni	Sabellariidae, ni	Polychaeta, ni. Noz spirorbids	Lepas pectinata	Lepas australis	Lepas sp.	Notochthamalus scabrosus	Balanomorpha, ni	Isopoda, ni	Nudibranchia, eggmass	Fiona pinnata	Mytilidae, ni	other, ni
Mar Brava South	0	2021-05-06	add	1	HPL	Bottles	PET bottle with cap	AG6	PL02	yes	1																1
Mar Brava South	0	2021-05-06	add	2	HPL	Bottles	PET bottle with blue cap	AG6	PL02	yes	1																1
Mar Brava South	0	2021-05-06	add	3	HPL	Bottles	PET bottle with black cap, CocaCola	AG6	PL02	yes	1																1
Mar Brava South	0	2021-05-06	add	5	HPL	HPL fragments, not PET	HPL fragment, blue	AG79	PL24	yes	2		1									1
Mar Brava South	0	2021-05-06	add	6	HPL	HPL caps and lids	Bottle cap	AG20	PL01	yes	1																								1
Mar Brava South	0	2021-05-06	add	9	Ropes	Ropes and rope bundles, synthetic	Rope green	AG48	PL19	yes	1															1
Mar Brava South	0	2021-05-06	add	14	Ropes	Ropes and rope bundles, synthetic	Rope green	AG48	PL19	yes	1																1
Mar Brava South	0	2021-05-06	add	15	TPL	Food wrappers, packaging	Label	AG25, 30, 66	PL06	yes	1																		1
Mar Brava South	1	2021-05-07	quant	1	TPL	Food wrappers, packaging	Packaging, Nestlé	AG25, 30, 66	PL06	yes	1											1
Mar Brava South	1	2021-05-07	quant	4	TPL	Food wrappers, packaging	Sheeting, black fragment	AG25, 30, 66	PL06	yes	1										1
Mar Brava South	1	2021-05-07	quant	7	Other, Mix	Processed wood, miscellaneous	Wood processed	AG170	WD04,06	nd	1																	1
Mar Brava South	2	2021-05-08	quant	10	TPL	Bags	Fragment of thicker PL bags, melted	AG2	PL07	nd	1									1
Mar Brava South	2	2021-05-08	quant	11	HPL	HPL caps and lids	Bottle cap ring	AG20	PL01	yes	2					1					1
Mar Brava South	2	2021-05-08	add	14	Ropes	Ropes and rope bundles, synthetic	Rope	AG48	PL19	yes	1																								1
Mar Brava South	3	2021-05-09	quant	14	HPL	HPL caps and lids	Bottle cap, HPL, white	AG20	PL01	yes	1			1
Mar Brava South	4	2021-05-10	quant	9	Ropes	Ropes and rope bundles, synthetic	Rope bundle	AG48	PL19	no	1																							1
Mar Brava South	4	2021-05-10	add	14	HPL	HPL fragments, not PET	HPL fragment, blue	AG79	PL24	yes	1											1
Mar Brava South	4	2021-05-10	add	17	Other, Mix	Textile & shoes	Shoe	AG135	CL01	nd	1																1
Mar Brava South	4	2021-05-10	add	18	HPL	Bottles	PET bottle with blue cap	AG6	PL02	yes	2															1	1
Mar Brava South	5	2021-05-11	add	7	HPL	HPL fragments, not PET	HPL fragment, yellow	AG79	PL24	yes	1															1
Mar Brava South	6	2021-05-12	add	16	Ropes	Ropes and rope bundles, synthetic	Rope green with piece of plastic	AG48	PL19	nd	3					1	1					1			1
Mar Brava South	6	2021-05-12	add	18	HPL	Bottles	PET bottle with blue cap	AG6	PL02	yes	1															1
Mar Brava South	7	2021-05-13	add	12	OPL	PET fragments	PET bottle, broken	AG79	PL24	no	6			1	1	1		1	1			1		1
Mar Brava South	8	2021-05-14	quant	7	Ropes	Ropes and rope bundles, synthetic	Rope	AG48	PL19	yes	1																							1
Mar Brava South	8	2021-05-14	quant	9	Ropes	Ropes and rope bundles, synthetic	Rope	AG48	PL19	no	1										1
Mar Brava South	9	2021-05-15	add	10	Ropes	Ropes and rope bundles, synthetic	Rope	AG48	PL19	yes	1																							1
Mar Brava South	9	2021-05-15	quant	12	HPL	HPL caps and lids	Tap, white HPL, PP (code 5)	AG20	PL01	yes	2															1						1	1
Mar Brava South	10	2021-05-16	quant	3	TPL	Food wrappers, packaging	Packaging, white	AG25, 30, 66	PL06	yes	1																				1
Mar Brava South	10	2021-05-16	quant	6	TPL	Food wrappers, packaging	Thin PL container, Jelly	AG25, 30, 66	PL06	yes	1										1
Mar Brava South	10	2021-05-16	quant	7	Ropes	Ropes and rope bundles, synthetic	Rope green	AG48	PL19	yes	1										1
Mar Brava South	10	2021-05-16	quant	8	TPL	Food wrappers, packaging	TPL container, black	AG25, 30, 66	PL06	no	1												1
Mar Brava South	10	2021-05-16	add	11	TPL	Food wrappers, packaging	Sheeting	AG25, 30, 66	PL06	yes	1	1
Mar Brava South	11	2021-05-17	quant	5	Ropes	Ropes and rope bundles, synthetic	Rope green	AG48	PL19	yes	1										1
Mar Brava South	11	2021-05-17	quant	6	TPL	Bags	Bag woven, violet color	AG36	PL16	yes	1																							1
Mar Brava South	12	2021-05-18	quant	8	OPL	Foams, other	Piece of foamed polystyrene	AG82	FP02, 04	yes	1																			1
Mar Brava South	12	2021-05-18	add	15	HPL	Bottles	Bottle PE (Code 2)	AG6	PL02	yes	1																	1
Mar Brava South	12	2021-05-18	add	16	Ropes	Ropes and rope bundles, synthetic	Rope white, l = 118 cm; d = 1.5cm	AG48	PL19	yes	3					1						1			1
										Average	1.35135
										St.Dev	0.949158

## Sheet: Epibionts MBN
Beach	Day	Date	quant/add	Raft ID	Main category	Subcategory	Description	JML	UNEP	floats?	∑ species	Electridae, ni	Hippothoidae, ni	Cheilostomatida, ni	Schizoporelloidae, ni	Flustrina, ni	Balanidae, ni	Verruca laevigata	Balanus laevis	Lepas sp	Lepas pectinata	Lepas australis	Cirripedia, ni (cyprids only)	Spirorbinae, ni	Polychaeta, not spirorbids, ni	Hydroids, ni	Mytilidae, ni	Gastropoda, ni	Nematoda, ni
Mar Brava North	0	2021-05-06	add	12	HPL	HPL caps and lids	Bottle cap, non-beverage	AG20	PL01	yes	1													1
Mar Brava North	0	2021-05-06	add	13	OPL	PET fragments	PET frag	AG79	PL24	no	1		1
Mar Brava North	0	2021-05-06	add	1A	HPL	HPL items, other	Tube black	AG79	PL24	yes	1									1
Mar Brava North	0	2021-05-06	add	1B	HPL	Bottles	HPL bottle, black (outside)	AG6	PL02	yes	3	1				1			1
Mar Brava North	0	2021-05-06	add	3A = 6B	Ropes	Ropes and rope bundles, synthetic	Rope	AG48	PL19	yes	1					1
Mar Brava North	0	2021-05-06	add	3B	HPL	Fishing light sticks & lures	Fishing light stick	AG60	PL17	yes	1													1
Mar Brava North	1	2021-05-07	quant	2	Ropes	Ropes and rope bundles, synthetic	Rope, green	AG48	PL19	yes	1										1
Mar Brava North	2	2021-05-08	quant	1	Ropes	Ropes and rope bundles, synthetic	Rope, green	AG48	PL19	yes	3										1	1				1
Mar Brava North	2	2021-05-08	quant	2	HPL	Fishing light sticks & lures	Fishing light stick	AG60	PL17	yes	1												1
Mar Brava North	2	2021-05-08	add	3	HPL	Fishing light sticks & lures	Fishing light stick	AG60	PL17	yes	1										1
Mar Brava North	3	2021-05-09	quant	2	HPL	HPL caps and lids	HPL cap white	AG20	PL01	yes	1												1
Mar Brava North	5	2021-05-11	quant	2	Ropes	Ropes and rope bundles, synthetic	Rope, green	AG48	PL19	yes	2																1	1
Mar Brava North	5	2021-05-11	quant	5	Ropes	Ropes and rope bundles, synthetic	Rope, white	AG48	PL19	yes	1				1
Mar Brava North	5	2021-05-11	quant	7	TPL	Food wrappers, packaging	Packaging, colored	AG30	PL06	yes	1												1
Mar Brava North	5	2021-05-11	quant	8	HPL	HPL caps and lids	Bottle cap ring blue	AG20	PL01	yes	2				1									1
Mar Brava North	6	2021-05-12	quant	1	HPL	HPL caps and lids	HPL item, cap of sth	AG20	PL01	yes	1						1
Mar Brava North	6	2021-05-12	quant	3	Ropes	Ropes and rope bundles, synthetic	Rope green	AG48	PL19	yes	2			1												1
Mar Brava North	6	2021-05-12	add	5	HPL	HPL caps and lids	Pl inner piece of bottle cap	AG20	PL01	yes	2										1	1
Mar Brava North	6	2021-05-12	add	6	Ropes	Ropes and rope bundles, synthetic	Rope green	AG48	PL19	yes	1									1
Mar Brava North	7	2021-05-13	quant	1B	Other, Mix	Processed wood, miscellaneous	Wood, processed, fragment	AG170	WD06	yes	1										1
Mar Brava North	8	2021-05-14	quant	6	HPL	HPL caps and lids	Cap of Tetrapak	AG20	PL01	yes	1															1
Mar Brava North	9	2021-05-15	quant	5	HPL	HPL items, other	HPL item, X-shape	AG79	PL24	yes	1									1
Mar Brava North	9	2021-05-15	quant	7	HPL	HPL items, other	HPL item, piece of washing machine	AG79	PL24	yes	1													1
Mar Brava North	10	2021-05-16	add	2	HPL	Bottles	Bottle with blue cap	AG6	PL02	yes	1											1
Mar Brava North	10	2021-05-16	add	3	HPL	Bottles	Bottle with orange cap	AG6	PL02	yes	2											1							1
Mar Brava North	12	2021-05-18	quant	1	Ropes	Ropes and rope bundles, synthetic	Rope, white	AG48	PL19	no	1													1
Mar Brava North	12	2021-05-18	add	6	HPL	Bottles	Bottle, very strongly fouled	AG6	PL02	yes	4				1			1						1	1
										Average	1.44444
										St.Dev	0.800641

## Sheet: Epibionts Ritoque
Beach	Day	Date	quant/add	Raft ID	Main category	Subcategory	Description	JML	UNEP	floats?	∑ species	Bryozoa, encrusting, ni	Cheilostomatida, ni	Flustrina, ni	Hippothoidae, ni	Andreella megapora	Exochella sp.	Schizoporelloidea ni	Ellisina sp.	Odontionella sp.	Fenestrulina sp.	Chaperia sp.	Buguloidea, ni	Bugulidae, ni	Hippaliosina dorbignyana	Cauloramphus sp.	Celleporella hyalina auctt.	Membranipora sp.	Electridae, ni	Conopeum sp.	Plagioecia sp.	Tubulipora sp.	Disporella sp.	other, ni, sp2 (soft)	other, ni sp1 (encrusting, bacteria?)	Foraminifera, ni	Rosalina globularis d’Orbigny, 1826	Planulina ariminensis d’Orbigny, 1826	Scurria variabilis	Scurria sp.	Trochita trochiformis	Lottia orbignyi	Siphonaria lessonii	Phymactis papillosa	Anthopleura cf. Hermaphroditica	Paranthus niveus	Hydrozoa, ni	Leptothecata, ni	Polychaeta, ni, not spirorbids
Ritoque	0	2021-04-20	add	1	OPL	PET fragments	Bottle PET, broken	AG79	PL24	no	2																																				1
Ritoque	0	2021-04-20	add	2	Other, mix	Textile & shoes	Textile fragment	AG135	CL01	no	1
Ritoque	0	2021-04-20	add	3	HPL	HPL fragments, not PET	HPL fragment, black	AG79	PL24	yes	3					1																1	1
Ritoque	0	2021-04-20	add	4	Other, mix	Processed wood	Processed wood fragment	AG170	WD04,06	yes	2
Ritoque	0	2021-04-20	add	5	Other, mix	Textile & shoes	Part of shoe sole	AG135	CL01	no	1
Ritoque	0	2021-04-20	add	6	Other, mix	Glass & ceramics	Glass bottle, closed	AG200	GC02	yes	2																											1									1
Ritoque	0	2021-04-20	add	7	HPL	HPL items, other	HPL object black	AG79	PL24	yes	2
Ritoque	0	2021-04-20	add	8	OPL	PET fragments	PET bottle small, intact, without cap	AG79	PL24	no	3																		1																		1
Ritoque	0	2021-04-20	add	9	HPL	Bottles	Bottle white with bitemarks, without cap	AG6	PL02	yes	1
Ritoque	0	2021-04-20	add	10	TLP	Packaging TPL	PL fragment, black, thin	AG79	PL24	no	4		1																																		1
Ritoque	0	2021-04-20	add	11	HPL	HPL caps and lids	bottle cap, dark green	AG20	PL01	yes	2																																				1
Ritoque	0	2021-04-20	add	12	HPL	HPL caps and lids	bottle cap, yellow, with inside	AG20	PL01	yes	3				1		1												1
Ritoque	0	2021-04-20	add	13	HPL	HPL caps and lids	cap, white	AG20	PL16	yes	1
Ritoque	0	2021-04-20	add	14	TPL	Packaging TPL	packaging, transparent	AG30		yes	2																																				1
Ritoque	0	2021-04-20	add	15	TPL	Drinking straws, SUP	Drinking straw, PL, blue	AG35	PL04	yes	1
Ritoque	0	2021-04-20	add	16	TPL	Strapping TPL	Strapping band	AG66	PL21	yes	3																																				1
Ritoque	0	2021-04-20	add	17	HPL	HPL items, other	Knife handle	AG79	PL24	yes	4
Ritoque	0	2021-04-20	add	18	Other, mix	Processed wood	Processed wood, piece	AG170	WD04,06	yes	2																												1
Ritoque	0	2021-04-20	add	19	HPL	HPL items, other	black object, polypropylene	AG79	PL24	yes	3																	1																			1
Ritoque	0	2021-04-20	add	20	HPL	Bottles	bottle, blue-green color, broken	AG6	PL02	yes	4		1																																		1
Ritoque	0	2021-04-20	add	21	HPL	HPL fragments, not PET	HPL fragment green	AG79	PL24	yes	1
Ritoque	0	2021-04-20	add	22	HPL	HPL fragments, not PET	HPL fragment, grey	AG79	PL24	yes	3
Ritoque	0	2021-04-20	add	23	Other, mix	Metal	metal piece	AG198	ME10	no	1
Ritoque	0	2021-04-20	add	24	HPL	HPL caps and lids	bottle cap, yellow, PL	AG20	PL01	yes	2		1		1
Ritoque	0	2021-04-20	add	26	TPL	Food containers, not foamed, SUP	container, single-use, transparent, thin PL	AG10	PL06	yes	3																																				1
Ritoque	1	2021-04-21	quant	1	OPL	PET fragments	PET fragment	AG79	PL24	no	2				1
Ritoque	1	2021-04-21	quant	2	OPL	PET fragments	PET fragment	AG79	PL24	no	1																		1
Ritoque	1	2021-04-21	quant	3	TPL	Food containers, not foamed, SUP	food container, thin PL, transparent	AG10	PL06	yes	2																																				1
Ritoque	1	2021-04-21	quant	4	TPL	Packaging TPL	food wrapper, type sweets	AG30		yes	1																																				1
Ritoque	1	2021-04-21	quant	5	TPL	Packaging TPL	packaging, thin plastic	AG30	PL06	yes	1																																				1
Ritoque	1	2021-04-21	quant	6	TPL	Packaging TPL	food wrapper, type sweets	AG30		yes	1																																				1
Ritoque	1	2021-04-21	quant	7	Rope	Ropes and rope bundles, synthetic	green rope	AG48	PL19	yes	1
Ritoque	1	2021-04-21	quant	8	OPL	Plastic pieces, ni	Rubber-like item, black	AG79	PL24	no	3																																				1
Ritoque	1	2021-04-21	quant	9	TPL	Packaging TPL	Fragment, sheeting	AG66	PL16	yes	1																	1
Ritoque	1	2021-04-21	quant	10	TPL	Packaging TPL	packaging, transparent	AG30		yes	1																																				1
Ritoque	1	2021-04-21	quant	11	TPL	Packaging TPL	packaging, transparent	AG30		yes	1																																				1
Ritoque	1	2021-04-21	quant	12	TPL	Packaging TPL	Fragment, sheeting	AG66	PL16	yes	1																																				1
Ritoque	1	2021-04-21	add	13	HPL	HPL items, other	HPL food container, small, ni	AG10	PL06	yes	1																																				1
Ritoque	1	2021-04-21	add	14	HPL	HPL items, other	HPL object	AG124	PL24	yes	1																																				1
Ritoque	1	2021-04-21	add	15	HPL	HPL items, other	HPL, orange-colored	AG79	PL24	yes	3																																				1
Ritoque	1	2021-04-21	add	16	HPL	Crates, baskets, buckets	Fishing box green, fragment	AG13	PL13	yes	7				1			1																													1
Ritoque	1	2021-04-21	add	17	Other, mix	Textile & shoes	Shoe boot "Rocky"	AG135	CL01	yes	3																																				1
Ritoque	2	2021-04-22	quant	1	HPL	HPL caps and lids	cap	AG20	PL02	yes	1									1
Ritoque	2	2021-04-22	quant	2	OPL	PET fragments	PET (?) fragment	AG79	PL24	no	2																		1
Ritoque	2	2021-04-22	quant	3	HPL	HPL caps and lids	cap, blue	AG20	PL10	yes	1				1
Ritoque	2	2021-04-22	quant	4	HPL	HPL caps and lids	cap, red	AG20	PL14	yes	1		1		1
Ritoque	2	2021-04-22	quant	5	HPL	HPL caps and lids	cap, red	AG20	PL15	yes	3										1
Ritoque	2	2021-04-22	quant	6	HPL	Bottles	bottle, small, green, broken	AG6	PL02	yes	8		1		1			1											1			1															1
Ritoque	2	2021-04-22	quant	7	TPL	Packaging TPL	food wrapper, type sweets	AG30		yes	1	1
Ritoque	2	2021-04-22	quant	8	HPL	Bottles	bottle PL, not PET, upper part	AG6	PL02	yes	3				1
Ritoque	2	2021-04-22	quant	9	HPL	HPL caps and lids	cap, green	AG20	PL12	yes	2				1
Ritoque	2	2021-04-22	quant	10	HPL	HPL caps and lids	cap, blue	AG20	PL11	yes	1
Ritoque	2	2021-04-22	quant	11	HPL	HPL caps and lids	cap, beige	AG20	PL08	yes	1
Ritoque	2	2021-04-22	quant	12	HPL	HPL fragments, not PET	HPL piece (grid)	AG79	PL24	yes	1											1
Ritoque	2	2021-04-22	quant	13	HPL	HPL fragments, not PET	HPL piece, black	AG79	PL24	yes	2				1							1
Ritoque	2	2021-04-22	quant	14	OPL	Foams, other	piece of polystyrene	AG82		yes	3											1
Ritoque	2	2021-04-22	quant	15	OPL	Plastic pieces, ni	PL piece, flexible, not rigid	AG79	PL24	yes	2				1
Ritoque	2	2021-04-22	quant	16	HPL	HPL fragments, not PET	HPL piece, black	AG79	PL24	yes	1											1
Ritoque	2	2021-04-22	add	17	HPL	(Beach) toys	HPL toy	AG32	PL08	yes	1				1
Ritoque	2	2021-04-22	add	18	HPL	HPL items, other	HPL object	AG79	PL24	yes	2
Ritoque	3	2021-04-23	quant	1	OPL	Plastic pieces, ni	PL rubber-like piece	AG79	PL24	yes	1		1
Ritoque	3	2021-04-23	quant	2	Other, mix	Processed wood	Wood, processed	AG170	WD04,06	yes	1
Ritoque	3	2021-04-23	quant	3	TPL	Bags	PL bag, type "sheeting"	AG2	PL07	nd	1
Ritoque	3	2021-04-23	quant	4	TPL	Packaging TPL	PL packaging, thin	AG30		nd	1																																						1
Ritoque	3	2021-04-23	quant	5	OPL	Plastic, other	Cable, outer part	AG124	PL24	nd	2	1
Ritoque	4	2021-04-24	quant	1	OPL	Plastic, other	HPl/ rubber tube	AG124	PL24	yes	1
Ritoque	4	2021-04-24	quant	2	HPL	HPL items, other	Food container HPL pasta "amendoim"	AG10	PL06	yes	2
Ritoque	4	2021-04-24	quant	3	TPL	Bags	Bag, not supermarket type	AG2	PL07	nd	1
Ritoque	4	2021-04-24	quant	4	TPL	Packaging TPL	Food wrapper cookies "Triton"	AG30		yes	1
Ritoque	4	2021-04-24	quant	5	Rope	Ropes and rope bundles, synthetic	Rope	AG48	PL19	yes	1
Ritoque	4	2021-04-24	quant	6	TPL	Bags	Bag fragment	AG2	PL07	yes	1																	1
Ritoque	4	2021-04-24	quant	7	TPL	Packaging TPL	Food wrapper cookies "Triton"	AG30		yes	1
Ritoque	4	2021-04-24	quant	8	HPL	HPL caps and lids	Bottle cap	AG20	PL01	yes	2		1
Ritoque	4	2021-04-24	quant	9	TPL	Bags	Bag, fragment	AG2	PL07	yes	1																																				1
Ritoque	4	2021-04-24	quant	10	Other, mix	Metal	Fragment aluminium can	AG175	ME03	no	2		1
Ritoque	4	2021-04-24	add	12	HPL	HPL items, other	HPL, not specified	AG79	PL24	yes	4																							1															1
Ritoque	4	2021-04-24	quant	13	TPL	Cups, not foamed, SUP	single-use cup, thin plastic	AG33	PL06	yes	1																	1
Ritoque	4	2021-04-24	quant	11_A	OPL	Plastic pieces, ni	Plastic fragment	AG79	PL24	nd	2				1
Ritoque	4	2021-04-24	quant	11_B	HPL	HPL fragments, not PET	Fragment, hard plastic	AG79	PL24	yes	6													1				1																			1		1
Ritoque	5	2021-04-25	quant	2	TPL	Packaging TPL	packaging, thin plastic	AG30		yes	1
Ritoque	5	2021-04-25	quant	4	TPL	Packaging TPL	packaging, thin plastic	AG30		yes	1
Ritoque	5	2021-04-25	quant	5	TPL	Bags	Bag (type supermarket)	AG2	PL07	yes	1
Ritoque	5	2021-04-25	quant	6	HPL	HPL fragments, not PET	HPL fragment	AG79	PL24	yes	1
Ritoque	5	2021-04-25	quant	7	OPL	PET fragments	PET bottle, cut	AG79	PL24	no	2		1
Ritoque	5	2021-04-25	quant	8	HPL	HPL caps and lids	Cap bottle	AG20	PL04	yes	2																																					1
Ritoque	5	2021-04-25	quant	9	TPL	Packaging TPL	food wrapper, type sweets	AG30		yes	1																	1
Ritoque	5	2021-04-25	quant	10	TPL	Packaging TPL	food wrapper, type sweets	AG30		yes	1
Ritoque	5	2021-04-25	quant	11	TPL	Packaging TPL	food wrapper, type sweets	AG30		yes	1
Ritoque	5	2021-04-25	quant	12	TPL	Packaging TPL	Sheeting, NI	AG66	PL16	yes	1																																						1
Ritoque	5	2021-04-25	quant	13	TPL	Cups, not foamed, SUP	single-use cup, thin plastic	AG33	PL06	yes	1																	1
Ritoque	5	2021-04-25	quant	14	TPL	Packaging TPL	food wrapper, type sweets	AG30		yes	2																	1																				1
Ritoque	5	2021-04-25	quant	15	TPL	Packaging TPL	food wrapper, type sweets	AG30		yes	1
Ritoque	5	2021-04-25	quant	16	TPL	Bags	Bag black	AG2	PL07	nd	1																																				1
Ritoque	5	2021-04-25	quant	17	TPL	Packaging TPL	food wrapper, type sweets	AG30		yes	2																	1																				1
Ritoque	5	2021-04-25	quant	19	TPL	Packaging TPL	food wrapper, type sweets	AG30		yes	1																	1
Ritoque	5	2021-04-25	quant	20	HPL	HPL items, other	Gilette, single-use razor	AG124	PL24	yes	2
Ritoque	5	2021-04-25	quant	21	TPL	Bags	Bag	AG2	PL07	yes	1																																				1
Ritoque	5	2021-04-25	quant	22	Rope	Ropes and rope bundles, synthetic	Rope	AG48	PL19	yes	1
Ritoque	6	2021-04-26	quant	1	TPL	Packaging TPL	food wrapper, type sweets	AG30		yes	1																	1
Ritoque	6	2021-04-26	quant	2	TPL	Bags	Bog ziplock	AG2	PL07	nd	4																																	1			1
Ritoque	6	2021-04-26	quant	6	TPL	Cutlery, SUP	Spoon, plastic single-use	AG10	PL04	yes	1
Ritoque	6	2021-04-26	quant	7	TPL	Packaging TPL	sheeting, NI	AG30		yes	1																																				1
Ritoque	6	2021-04-26	quant	8	TPL	Packaging TPL	food wrapper, type sweets	AG30		yes	1
Ritoque	6	2021-04-26	quant	14	TPL	Packaging TPL	packaging, thin plastic, sanitary napkin	AG30		yes	2																																				1
Ritoque	6	2021-04-26	quant	15	TPL	Packaging TPL	food wrapper, type sweets	AG30		yes	1																	1
Ritoque	6	2021-04-26	quant	18	HPL	Bottles	Bottle	AG6	PL02	nd	2																																				1
Ritoque	6	2021-04-26	quant	19	OPL	PET fragments	PET fragment	AG79	PL24	nd	3	1																																			1
Ritoque	6	2021-04-26	quant	20	TPL	Packaging TPL	food wrapper, type sweets	AG30		yes	1																																				1
Ritoque	6	2021-04-26	quant	21	TPL	Packaging TPL	sheeting	AG66	PL16	yes	3																	1																			1
Ritoque	6	2021-04-26	quant	22	HPL	HPL caps and lids	Bottle cap ring	AG20	PL01	yes	2		1																																		1
Ritoque	6	2021-04-26	quant	23	TPL	Packaging TPL	food wrapper, type sweets	AG30		yes	3																	1																			1
Ritoque	6	2021-04-26	quant	24	TPL	Packaging TPL	food wrapper, type sweets	AG30		yes	2																	1
Ritoque	6	2021-04-26	add	25	OPL	Foamed food containers, SUP	Polystyrene single-use	AG10	FP02	yes	1
Ritoque	7	2021-04-27	quant	1	HPL	HPL caps and lids	Cap "cutlex"(?) bottle, cosmetics	AG20	PL03	yes	1
Ritoque	7	2021-04-27	quant	2	TPL	Food containers, not foamed, SUP	Food container, thin, single-use	AG10	PL06	yes	1
Ritoque	7	2021-04-27	quant	3	HPL	HPL caps and lids	Cap HPL	AG20	PL05	yes	1				1
Ritoque	7	2021-04-27	quant	4	TPL	Packaging TPL	food wrapper, type sweets	AG30		yes	1																	1
Ritoque	7	2021-04-27	quant	5	OPL	Plastic, other	Tube PVC	AG124	PL24	yes	2																																						1
Ritoque	7	2021-04-27	quant	6	TPL	Packaging TPL	food wrapper, type sweets	AG30		yes	2																																				1
Ritoque	7	2021-04-27	quant	7	TPL	Strapping TPL	Adhesive tape	AG87		yes	2																																				1
Ritoque	7	2021-04-27	quant	9	TPL	Packaging TPL	food wrapper, type sweets	AG30		yes	1																																				1
Ritoque	7	2021-04-27	quant	11	TPL	Packaging TPL	food wrapper, type sweets	AG30		yes	1																	1
Ritoque	7	2021-04-27	quant	12	TPL	Packaging TPL	food wrapper, type sweets	AG30		yes	4	1																																			1
Ritoque	7	2021-04-27	quant	13	Other, mix	Processed wood	Processed wood	AG170	WD04,06	yes	2																								1
Ritoque	7	2021-04-27	quant	14	OPL	PET fragments	Fragment PET	AG79	PL24	no	4		1	1																																		1
Ritoque	7	2021-04-27	quant	15	Other, mix	Metal	Aerosol can	AG174	ME10	no	7	1	1		1																	1									1
Ritoque	7	2021-04-27	quant	17	TPL	Packaging TPL	food wrapper, type sweets	AG30		yes	1																	1
Ritoque	8	2021-04-28	quant	13	OPL	Plastic pieces, ni	PL, burned(?)	NAG3		yes	3	1						1											1																		1
Ritoque	8	2021-04-28	quant	14	TPL	Packaging TPL	packaging, black	AG30		yes	1
Ritoque	8	2021-04-28	quant	16	TPL	Food containers, not foamed, SUP	PL container, thin, transparent	AG10	PL06	yes	1																	1
Ritoque	8	2021-04-28	quant	17	TPL	Packaging TPL	packaging, thin, PL	AG30		yes	1
Ritoque	8	2021-04-28	quant	21	HPL	HPL caps and lids	bottle cap ring, blue	AG20	PL01	yes	3											1														1
Ritoque	8	2021-04-28	quant	22	HPL	HPL caps and lids	Cap, Powerade	AG20	PL13	yes	2
Ritoque	8	2021-04-28	quant	23	HPL	HPL caps and lids	black bottle cap	AG20	PL01	yes	1											1
Ritoque	8	2021-04-28	quant	24	TPL	Packaging TPL	food wrapper, type sweets, white	AG30		yes	1
Ritoque	8	2021-04-28	quant	25	HPL	HPL caps and lids	Lid green, Tupperware®	AG20	PL23	yes	3			1	1
Ritoque	8	2021-04-28	quant	26	HPL	HPL caps and lids	bottle cap, red, HPL	AG20	PL01	yes	3	1																																			1
Ritoque	8	2021-04-28	quant	27	HPL	HPL caps and lids	HPL cap green	AG20	PL20	yes	2			1
Ritoque	8	2021-04-28	quant	28	HPL	HPL items, other	HPL, endpiece of sunshade	AG124	PL24	no	3																										1										1
Ritoque	8	2021-04-28	quant	29	HPL	HPL caps and lids	bottle cap, red, "Cachantun"	AG20	PL01	yes	2			1
Ritoque	8	2021-04-28	quant	30	HPL	HPL caps and lids	bottle cap, green	AG20	PL01	yes	1
Ritoque	8	2021-04-28	quant	31	HPL	HPL fragments, not PET	HPL fragment, transparent	AG79	PL24	yes	1				1
Ritoque	8	2021-04-28	quant	32	Other, mix	Textile & shoes	Shoe sole (?) fragment	AG135	CL01	yes	1
Ritoque	8	2021-04-28	quant	33	Other, mix	Metal	Metal piece	AG198	ME10	no	1		1	1											1
Ritoque	8	2021-04-28	quant	34	HPL	HPL caps and lids	Part of bottle cap, HPL, white	AG20	PL25	yes	1			1	1
Ritoque	8	2021-04-28	quant	35	HPL	HPL fragments, not PET	HPL fragment black	AG79	PL24	yes	1
Ritoque	8	2021-04-28	quant	38	HPL	HPL caps and lids	bottle cap, green and transparent, type "Chlorox" bottle	AG20	PL01	yes	3				1
Ritoque	8	2021-04-28	quant	39	HPL	HPL caps and lids	bottle cap, blue, HPL	AG20	PL01	yes	3						1												1
Ritoque	8	2021-04-28	quant	40	HPL	HPL caps and lids	bottle cap ring, blue	AG20	PL01	yes	1			1
Ritoque	8	2021-04-28	quant	41	HPL	HPL caps and lids	part of cap(?), not beverage, white	AG20	PL26	yes	2			1
Ritoque	8	2021-04-28	quant	42	HPL	HPL caps and lids	Cap HPL fragment	AG20	PL06	yes	1																																				1
Ritoque	8	2021-04-28	quant	10A	Other, mix	Textile & shoes	Shoe (Sole)	AG135	CL01	yes	4																																				1
Ritoque	8	2021-04-28	quant	11A	HPL	HPL fragments, not PET	HPL fragment, blue	AG79	PL24	yes	1
Ritoque	8	2021-04-28	quant	1A	OPL	Plastic, other	Red plastic, ni	AG124	PL24	yes	1
Ritoque	8	2021-04-28	quant	1B	TPL	Packaging TPL	packaging, black	AG30		yes	3																	1																			1
Ritoque	8	2021-04-28	quant	2B	TPL	Packaging TPL	packaging, transparent	AG30		yes	1																	1
Ritoque	8	2021-04-28	quant	3A	OPL	PET fragments	PET fragment	AG79	PL24	no	1							1
Ritoque	8	2021-04-28	quant	4A	OPL	Plastic pieces, ni	PL, burned? Black	NAG3		yes	1
Ritoque	8	2021-04-28	quant	4B	TPL	Packaging TPL	food wrapper, blue, Nestlé	AG30		yes	1																																				1
Ritoque	8	2021-04-28	quant	5A	HPL	HPL fragments, not PET	HPL piece, red	AG79	PL24	yes	1
Ritoque	8	2021-04-28	quant	5B	TPL	Packaging TPL	food wrapper, type sweets, white	AG30		yes	1
Ritoque	8	2021-04-28	quant	6A	HPL	HPL caps and lids	Bottle cap, white	AG20	PL01	yes	1
Ritoque	8	2021-04-28	quant	6B	TPL	Packaging TPL	packaging, cigarettes, transparent	AG25		yes	1																	1
Ritoque	8	2021-04-28	quant	7A	HPL	HPL caps and lids	Bottle cap, blue	AG20	PL01	yes	1															1
Ritoque	8	2021-04-28	quant	7B	HPL	HPL fragments, not PET	HPL piece, orange-colored	AG79	PL24	yes	4		1				1	1									1
Ritoque	8	2021-04-28	quant	8A	HPL	HPL caps and lids	Bottle cap, white	AG20	PL01	yes	1
Ritoque	8	2021-04-28	quant	8B	HPL	HPL caps and lids	Bottle cap green ring	AG20	PL01	yes	3											1															1										1
Ritoque	8	2021-04-28	quant	9A	HPL	HPL caps and lids	Bottle cap, ring, yellow	AG20	PL01	yes	1				1
Ritoque	8	2021-04-28	quant	9B	TPL	Packaging TPL	packaging, transparent	AG30		yes	1																	1
Ritoque	9	2021-04-29	quant	2	OPL	Plastic pieces, ni	PL? Melted?	NAG3		yes	2																																				1
Ritoque	9	2021-04-29	quant	4	TPL	Packaging TPL	packaging, blue	AG30		yes	1																	1
Ritoque	9	2021-04-29	quant	5	TPL	Packaging TPL	food wrapper, type sweets, violet-white	AG30		yes	1																	1
Ritoque	9	2021-04-29	quant	7	TPL	Packaging TPL	fragment, sheeting	AG66	PL16	yes	2				1																																1
Ritoque	9	2021-04-29	quant	8	TPL	Cups, not foamed, SUP	Single-use PL cup, thin PL	AG33	PL06	yes	1
Ritoque	9	2021-04-29	quant	10	TPL	Packaging TPL	packaging, transparent	AG30		yes	2																	1
Ritoque	9	2021-04-29	quant	11	TPL	Packaging TPL	food wrapper, Nestlé, black	AG30		yes	1																	1
Ritoque	9	2021-04-29	quant	12	TPL	Packaging TPL	food wrapper, type sweets , Nestlé, black	AG30		yes	1
Ritoque	9	2021-04-29	quant	13	TPL	Packaging TPL	food wrapper, type sweets , PL, white	AG30		yes	1																	1
Ritoque	9	2021-04-29	quant	14	TPL	Packaging TPL	packaging, transparent	AG30		yes	1																	1
Ritoque	9	2021-04-29	quant	15	Rope	Ropes and rope bundles, synthetic	rope, green	AG48	PL19	yes	1
Ritoque	9	2021-04-29	quant	16	HPL	HPL fragments, not PET	HPL fragment, orange-colored	AG79	PL24	yes	1
Ritoque	9	2021-04-29	quant	17	HPL	HPL caps and lids	bottle cap, HPL, non-beverage	AG20	PL01	yes	2																																				1
Ritoque	9	2021-04-29	quant	18	TPL	Packaging TPL	food wrapper, Lollipop	AG30		yes	2																																				1
Ritoque	9	2021-04-29	quant	19	HPL	HPL fragments, not PET	HPL fragment black	AG79	PL24	yes	2							1
Ritoque	9	2021-04-29	quant	20	TPL	Packaging TPL	food wrapper, type sweets, white	AG30		yes	1
Ritoque	9	2021-04-29	quant	21	TPL	Food containers, not foamed, SUP	Food packaging, single-use	AG10	PL06	yes	2	1
Ritoque	9	2021-04-29	quant	26	TPL	Packaging TPL	food wrapper, type sweets, blue-white	AG30		yes	1
Ritoque	9	2021-04-29	quant	27	HPL	HPL caps and lids	bottle cap, blue	AG20	PL01	yes	2																																				1
Ritoque	9	2021-04-29	quant	28	TPL	Packaging TPL	packaging, transparent	AG30		yes	1
Ritoque	9	2021-04-29	quant	29	TPL	Cups, not foamed, SUP	single-use cup, transparent, material "5" PP	AG33	PL06	yes	2																	1
Ritoque	9	2021-04-29	quant	30	OPL	Shotgun cartridge	Shotgun cartridge	AG70		yes	2																																				1
Ritoque	9	2021-04-29	quant	31	HPL	HPL fragments, not PET	HPL piece, turquoise-colored. Tap of sth.	AG79	PL24	yes	1
Ritoque	9	2021-04-29	quant	32	HPL	HPL caps and lids	tap (?), orange-colored. Polypropylene (Code 5)	AG20	PL30	yes	1
Ritoque	9	2021-04-29	quant	33	OPL	Single-use sanitary mask	Single-use sanitary mask	AG211	OT05	yes	4																																				1
Ritoque	9	2021-04-29	quant	34	TPL	Packaging TPL	Label, white (PL?)	AG30		yes	1																																				1
Ritoque	9	2021-04-29	quant	35	TPL	Packaging TPL	packaging sixpack, sheeting	AG30		yes	1
Ritoque	9	2021-04-29	quant	36	TPL	Cups, not foamed, SUP	single-use cup, transparent, "pamolisa"	AG33	PL06	yes	1																	1
Ritoque	9	2021-04-29	quant	38	Other, mix	Processed wood	Wood, processed	AG170	WD04,06	yes	1
Ritoque	9	2021-04-29	quant	39	Other, mix	Wax	Wax	AG213	OT01	yes	1
Ritoque	9	2021-04-29	quant	40	TPL	Packaging TPL	packaging, thin plastic	AG30		yes	1	1
Ritoque	9	2021-04-29	quant	41	OPL	Foams, other	Styrofoam fragment	AG82		yes	1
Ritoque	9	2021-04-29	quant	42	HPL	HPL items, other	HPL item white	AG79	PL24	yes	2	1
Ritoque	9	2021-04-29	quant	43	HPL	HPL caps and lids	bottle cap, white	AG20	PL01	yes	1
Ritoque	9	2021-04-29	quant	44	HPL	HPL caps and lids	bottle cap, HPL, yellow	AG20	PL01	yes	1
Ritoque	9	2021-04-29	quant	45	TPL	Packaging TPL	food wrapper, type sweets, Bonbon	AG30		yes	1
Ritoque	9	2021-04-29	quant	46	HPL	HPL caps and lids	Bottle cap, fragment, orange-colored	AG20	PL01	yes	1
Ritoque	9	2021-04-29	quant	47	HPL	HPL caps and lids	Bottle cap, beverage	AG20	PL01	yes	2							1																													1
Ritoque	9	2021-04-29	quant	48	TPL	Packaging TPL	food wrapper, type sweets, white	AG30		yes	2																	1																			1
Ritoque	9	2021-04-29	quant	50	TPL	Packaging TPL	packaging, transparent	AG30		yes	1																	1
Ritoque	9	2021-04-29	quant	51	TPL	Packaging TPL	packaging, transparent	AG30		yes	1																	1
Ritoque	9	2021-04-29	quant	52	TPL	Packaging TPL	food wrapper, type sweets, yellow	AG30		yes	1
Ritoque	9	2021-04-29	quant	54	TPL	Packaging TPL	food wrapper, type sweets , PL-metallic	AG30		yes	2																	1
Ritoque	9	2021-04-29	quant	55	TPL	Packaging TPL	food wrapper, Lollipop	AG30		yes	1
Ritoque	9	2021-04-29	quant	56	HPL	HPL fragments, not PET	HPL fragment, green	AG79	PL24	yes	1											1
Ritoque	9	2021-04-29	quant	58	HPL	HPL fragments, not PET	HPL piece	AG79	PL24	yes	1																	1
Ritoque	9	2021-04-29	quant	59	TPL	Packaging TPL	packaging, transparent	AG30		yes	1																	1
Ritoque	9	2021-04-29	quant	60	TPL	Packaging TPL	food wrapper, type sweets, violet	AG30		yes	1																	1
Ritoque	9	2021-04-29	quant	61	TPL	Packaging TPL	packaging, blue	AG30		yes	1																	1
Ritoque	9	2021-04-29	quant	62	TPL	Packaging TPL	food wrapper, type sweets, white-green	AG30		yes	1	1
Ritoque	9	2021-04-29	quant	64	TPL	Packaging TPL	packaging, transparent, cigarettes	AG25		yes	1																	1
Ritoque	9	2021-04-29	quant	65	TPL	Packaging TPL	packaging, transparent	AG30		yes	1																																				1
Ritoque	9	2021-04-29	quant	66	HPL	HPL caps and lids	Ballpoint cap	AG20	PL01	yes	1																																	1
Ritoque	9	2021-04-29	quant	67	TPL	Packaging TPL	food wrapper, type sweets , dark	AG30		yes	2																													1
Ritoque	9	2021-04-29	quant	68	Other, mix	Textile & shoes	Textile (?)	AG135	CL01	no	1
Ritoque	9	2021-04-29	quant	69	TPL	Packaging TPL	packaging, transparent	AG30		yes	1																	1
Ritoque	9	2021-04-29	quant	70	Rope	Ropes and rope bundles, synthetic	green rope	AG48	PL19	yes	1
Ritoque	9	2021-04-29	quant	71	TPL	Packaging TPL	food wrapper, type sweets, white	AG30		yes	1																																				1
Ritoque	9	2021-04-29	quant	72	HPL	HPL caps and lids	HPL bottle cap, red	AG20	PL19	yes	1
Ritoque	9	2021-04-29	quant	73	HPL	HPL caps and lids	HPL cap, green and white	AG20	PL22	yes	2			1
Ritoque	9	2021-04-29	quant	74	HPL	HPL items, other	HPL object black	AG79	PL24	yes	1
Ritoque	9	2021-04-29	quant	75	TPL	Packaging TPL	food wrapper, type sweets, white-yellow	AG30		yes	2																	1
Ritoque	9	2021-04-29	quant	77	HPL	HPL items, other	HPL spoon, beige	AG10	PL06	yes	2				1
Ritoque	9	2021-04-29	quant	78	TPL	Packaging TPL	food wrapper, type sweets, white	AG30		yes	1
Ritoque	9	2021-04-29	quant	79	TPL	Packaging TPL	food wrapper, type sweets	AG30		yes	1
Ritoque	9	2021-04-29	quant	80	TPL	Bags	Bag	AG2	PL07	yes	1
Ritoque	9	2021-04-29	quant	81	HPL	HPL caps and lids	Ring of bottle cap, green	AG20	PL28	yes	2																																				1
Ritoque	9	2021-04-29	quant	84	HPL	HPL items, other	HPL container, blue, butter (?)	AG10	PL06	yes	5											1															1					1
Ritoque	9	2021-04-29	quant	85	HPL	HPL caps and lids	red HPL bottle cap	AG20	PL27	yes	4			1	1							1
Ritoque	9	2021-04-29	quant	86	TPL	Packaging TPL	food wrapper, type sweets, white	AG30		yes	1																	1
Ritoque	9	2021-04-29	quant	87	TPL	Packaging TPL	food wrapper, type sweets , orange-colored	AG30		yes	1
Ritoque	9	2021-04-29	quant	88	TPL	Cups, not foamed, SUP	single-use cup, transparent	AG33	PL06	yes	4			1									1					1																			1
Ritoque	9	2021-04-29	quant	89	HPL	HPL items, other	HPL object black	AG79	PL24	yes	3								1											1																	1
Ritoque	9	2021-04-29	quant	90	HPL	HPL fragments, not PET	HPL fragment white	AG79	PL24	yes	1																																	1
Ritoque	10	2021-04-30	quant	1	HPL	HPL fragments, not PET	HPL piece, black	AG79	PL24	yes	4			1																					1
Ritoque	10	2021-04-30	quant	2	HPL	HPL caps and lids	Lid, green, lunch box	AG20	PL24	yes	5				1													1
Ritoque	10	2021-04-30	quant	3	HPL	(Beach) toys	"Play-Doh" container, yellow, broken	AG32	PL08	yes	1																	1
Ritoque	10	2021-04-30	quant	4	TPL	Cutlery, SUP	Spoon, PL, single-use, white	AG10	PL04	yes	2																	1
Ritoque	10	2021-04-30	quant	5	TPL	Packaging TPL	sheeting. Fragment	AG66	PL16	yes	1																	1
Ritoque	10	2021-04-30	quant	6	TPL	Cups, not foamed, SUP	single-use cup, transparent, thin PL	AG33	PL06	yes	1																	1
Ritoque	10	2021-04-30	quant	7	HPL	HPL fragments, not PET	HPL fragment, white	AG79	PL24	yes	1																	1
Ritoque	10	2021-04-30	quant	8	TPL	Cups, not foamed, SUP	cup, single use, thin PL, transparent	AG33	PL06	yes	1																	1
Ritoque	10	2021-04-30	quant	9	TPL	Cups, not foamed, SUP	cup, single use, thin PL, transparent	AG33	PL06	yes	1																	1
Ritoque	10	2021-04-30	quant	10	TPL	Food containers, not foamed, SUP	Food packaging, yoghurt	AG10	PL06	yes	1
Ritoque	10	2021-04-30	quant	11	Rope	Ropes and rope bundles, synthetic	Rope	AG48	PL19	yes	4				1																																1
Ritoque	10	2021-04-30	quant	12	OPL	Plastic pieces, ni	Object, NI, PL, red	AG79	PL24	yes	1
Ritoque	10	2021-04-30	quant	13	TPL	Packaging TPL	food wrapper, type sweets	AG30		yes	1																	1
Ritoque	10	2021-04-30	quant	14	TPL	Packaging TPL	food wrapper, type sweets	AG30		yes	2																	1
Ritoque	10	2021-04-30	quant	15	TPL	Packaging TPL	food wrapper, type sweets, white	AG30		yes	2																	1
Ritoque	10	2021-04-30	quant	16	TPL	Packaging TPL	packaging, transparent	AG30		yes	1																	1
Ritoque	10	2021-04-30	quant	17	HPL	HPL caps and lids	Cap, black	AG20	PL09	yes	1
Ritoque	10	2021-04-30	quant	19	TPL	Bags	Bag, plastic, small	AG2	PL07	yes	1																	1
Ritoque	10	2021-04-30	quant	20	TPL	Packaging TPL	packaging, transparent, cigarettes	AG25		yes	1																	1
Ritoque	10	2021-04-30	quant	21	TPL	Packaging TPL	food wrapper, type sweets, white	AG30		yes	1																																				1
Ritoque	10	2021-04-30	quant	22	TPL	Packaging TPL	packaging, transparent	AG30		yes	1																	1
Ritoque	10	2021-04-30	quant	23	Other, mix	Textile & shoes	Fragment, textile?	AG135	CL01	yes	1	1
Ritoque	10	2021-04-30	quant	24	TPL	Packaging TPL	food wrapper, type sweets, yellow	AG30		yes	1																	1
Ritoque	10	2021-04-30	quant	25	HPL	HPL fragments, not PET	HPL fragment, white	AG79	PL24	yes	1																	1
Ritoque	10	2021-04-30	quant	27	HPL	HPL fragments, not PET	HPL fragment	AG79	PL24	yes	2						1														1
Ritoque	10	2021-04-30	quant	28	TPL	Packaging TPL	food wrapper, type sweets, "Sapito"	AG30		yes	1																	1
Ritoque	10	2021-04-30	quant	29	TPL	Packaging TPL	food wrapper, type sweets colored	AG30		yes	1																	1
Ritoque	10	2021-04-30	quant	30	TPL	Packaging TPL	food wrapper, type sweets, white	AG30		yes	2																	1
Ritoque	10	2021-04-30	quant	31	HPL	HPL fragments, not PET	HPL piece, green	AG79	PL24	yes	1
Ritoque	10	2021-04-30	quant	32	TPL	Packaging TPL	food wrapper, type sweets, yellow	AG30		yes	2																	1
Ritoque	10	2021-04-30	quant	33	TPL	Packaging TPL	food wrapper, type sweets, white	AG30		yes	2																	1
Ritoque	10	2021-04-30	quant	34	TPL	Packaging TPL	food wrapper, type sweets colored	AG30		yes	2																	1
Ritoque	10	2021-04-30	quant	35	TPL	Packaging TPL	packaging, blue	AG30		yes	1																	1
Ritoque	10	2021-04-30	quant	36	TPL	Packaging TPL	packaging, blue	AG30		yes	1
Ritoque	10	2021-04-30	quant	37	TPL	Packaging TPL	food wrapper, type sweets , green	AG30		yes	1
Ritoque	10	2021-04-30	quant	38	TPL	Packaging TPL	Label packaging "Limon Soda"	AG30		yes	1																	1
Ritoque	10	2021-04-30	quant	39	TPL	Packaging TPL	food wrapper, type sweets, brown	AG30		yes	1																	1
Ritoque	10	2021-04-30	quant	40	TPL	Packaging TPL	food wrapper, type sweets, yellow	AG30		yes	2																	1
Ritoque	10	2021-04-30	quant	41	TPL	Packaging TPL	packaging, transparent	AG30		yes	1																	1
Ritoque	10	2021-04-30	quant	42	TPL	Packaging TPL	packaging, beige	AG30		yes	1
Ritoque	10	2021-04-30	quant	43	TPL	Packaging TPL	food wrapper, "Alka Ice Mentol"	AG30		yes	1																	1
Ritoque	10	2021-04-30	quant	44	TPL	Packaging TPL	packaging, "Dinosaur Paradise"	AG30		yes	2																	1
Ritoque	10	2021-04-30	quant	45	TPL	Packaging TPL	packaging, black	AG30		yes	1
Ritoque	10	2021-04-30	quant	46	TPL	Packaging TPL	packaging, "Virutex"	AG30		yes	1																	1
Ritoque	10	2021-04-30	quant	47	Rope	Ropes and rope bundles, synthetic	green rope	AG48	PL19	yes	1
Ritoque	10	2021-04-30	quant	49	TPL	Packaging TPL	packaging, transparent	AG30		yes	1																	1
Ritoque	10	2021-04-30	quant	50	TPL	Packaging TPL	food wrapper, type sweets, blue-white	AG30		yes	1																	1
Ritoque	10	2021-04-30	quant	51	TPL	Packaging TPL	food wrapper, type sweets , Nestlé	AG30		yes	1
Ritoque	10	2021-04-30	quant	52	HPL	HPL caps and lids	bottle cap, PL	AG20	PL01	yes	2																										1												1
Ritoque	10	2021-04-30	quant	53	TPL	Food containers, not foamed, SUP	Packaging, jelly, PL, thin, transp	AG10	PL06	yes	1																	1
Ritoque	10	2021-04-30	quant	54	TPL	Packaging TPL	packaging, transparent	AG30		yes	2																	1
Ritoque	10	2021-04-30	quant	55	TPL	Packaging TPL	food wrapper, type sweets, white	AG30		yes	1
Ritoque	10	2021-04-30	quant	56	TPL	Packaging TPL	food wrapper, type sweets, white	AG30		yes	1																	1
Ritoque	10	2021-04-30	quant	57	TPL	Packaging TPL	food wrapper, type sweets, white	AG30		yes	2																	1
Ritoque	10	2021-04-30	quant	58	TPL	Packaging TPL	food wrapper, type sweets, white	AG30		yes	1																	1
Ritoque	10	2021-04-30	quant	61	TPL	Packaging TPL	packaging, transparent	AG30		yes	1																	1
Ritoque	10	2021-04-30	quant	62	TPL	Packaging TPL	food wrapper, type sweets, "Masticazoo"	AG30		yes	1
Ritoque	10	2021-04-30	quant	63	TPL	Packaging TPL	food wrapper, type sweets, white	AG30		yes	1																	1
Ritoque	10	2021-04-30	quant	64	TPL	Packaging TPL	food wrapper type sweets, "Gomel@"	AG30		yes	1																	1
Ritoque	10	2021-04-30	quant	65	HPL	HPL caps and lids	ring of bottle cap, green	AG20	PL29	yes	2			1
Ritoque	10	2021-04-30	quant	67	TPL	Packaging TPL	packaging, transparent	AG30		yes	1	1
Ritoque	10	2021-04-30	quant	68	OPL	Gloves, single-use	Glove, single-use	AG39	PL09	yes	1																	1
Ritoque	10	2021-04-30	quant	69	TPL	Packaging TPL	food wrapper, type sweets	AG30		yes	1																																				1
Ritoque	10	2021-04-30	quant	70	TPL	Packaging TPL	food wrapper, type sweets	AG30		yes	1																	1
Ritoque	10	2021-04-30	quant	71	TPL	Packaging TPL	food wrapper, type sweets, white	AG30		yes	1
Ritoque	10	2021-04-30	quant	73	HPL	HPL fragments, not PET	HPL fragment, transparent	AG79	PL24	yes	1
Ritoque	10	2021-04-30	quant	74	TPL	Packaging TPL	packaging, transparent	AG30		yes	1	1
Ritoque	10	2021-04-30	quant	78	HPL	HPL fragments, not PET	HPL fragment, white	AG79	PL24	yes	1
Ritoque	10	2021-04-30	quant	79	TPL	Packaging TPL	packaging, transparent	AG30		yes	2																									1											1
Ritoque	10	2021-04-30	quant	84	TPL	Packaging TPL	food wrapper, type sweets , purple	AG30		yes	2																	1
Ritoque	10	2021-04-30	quant	86	OPL	Foams, other	polystyrene piece	AG79	PL24	yes	5											1																									1
Ritoque	10	2021-04-30	quant	87	HPL	HPL caps and lids	Cap white fragment	AG20	PL07	yes	1																																						1
Ritoque	10	2021-04-30	quant	89	TPL	Cups, not foamed, SUP	Cup, single-use	AG33	PL06	yes	9		1		1							1						1																1			1		1
Ritoque	10	2021-04-30	quant	90	TPL	Cups, not foamed, SUP	Cup, single-use	AG33	PL06	yes	8				1							1						1															1				1
Ritoque	10	2021-04-30	quant	91	HPL	HPL fragments, not PET	HPL fragment	AG79	PL24	yes	6			1	1							1																							1
Ritoque	10	2021-04-30	quant	92	Rope	Ropes and rope bundles, synthetic	Rope	AG48	PL19	nd	2
Ritoque	10	2021-04-30	quant	93	TPL	Packaging TPL	packaging, thin plastic	AG30		yes	4																	1																			1
Ritoque	10	2021-04-30	quant	XY	HPL	HPL items, other	Round object	AG79	PL24	yes	1																	1
Ritoque	11	2021-05-01	quant	1	TPL	Packaging TPL	food wrapper, type sweets	AG30		yes	1																	1
Ritoque	11	2021-05-01	quant	3	HPL	HPL caps and lids	bottle cap ring	AG20	PL01	yes	1																																						1
Ritoque	11	2021-05-01	quant	5	TPL	Packaging TPL	packaging sixpack	AG30		yes	2																	1
Ritoque	11	2021-05-01	quant	6	HPL	HPL items, other	Flower pot, HPL	AG79	PL24	yes	5																	1																			1
Ritoque	11	2021-05-01	quant	7	TPL	Packaging TPL	Label, thin plastic	AG30		yes	1																	1
Ritoque	11	2021-05-01	quant	8	TPL	Packaging TPL	food wrapper, type sweets	AG30		yes	1																	1
Ritoque	11	2021-05-01	quant	9	TPL	Packaging TPL	food wrapper, type sweets	AG30		yes	2																	1
Ritoque	11	2021-05-01	quant	12	TPL	Packaging TPL	food wrapper, type sweets	AG30		yes	2																	1																			1
Ritoque	11	2021-05-01	quant	13	TPL	Cutlery, SUP	Spoon, PL, single-use	AG10	PL04	yes	1
Ritoque	11	2021-05-01	quant	14	TPL	Packaging TPL	Label, thin plastic	AG30		yes	2																	1
Ritoque	11	2021-05-01	quant	15	HPL	HPL caps and lids	bottle cap, PL	AG20	PL01	yes	1
Ritoque	11	2021-05-01	quant	16	OPL	Plastic pieces, ni	object, NI, red	AG79	PL24	yes	1
Ritoque	11	2021-05-01	quant	17	HPL	HPL caps and lids	bottle cap, yellow	AG20	PL01	yes	1
Ritoque	11	2021-05-01	quant	18	HPL	HPL fragments, not PET	HPL fragment	AG79	PL24	yes	1
Ritoque	11	2021-05-01	quant	19	TPL	Packaging TPL	food wrapper, type sweets	AG30		yes	1																	1
Ritoque	11	2021-05-01	quant	20	OPL	Foamed food containers, SUP	fragment styrofoam, single-use	AG10	FP02	yes	1
Ritoque	11	2021-05-01	quant	22	TPL	Packaging TPL	food wrapper, type sweets	AG30		yes	2																																				1
Ritoque	11	2021-05-01	quant	23	TPL	Packaging TPL	packaging sixpack	AG30		yes	2																	1
Ritoque	11	2021-05-01	quant	24	TPL	Packaging TPL	food wrapper, type sweets	AG30		yes	2																	1
Ritoque	11	2021-05-01	quant	25	OPL	Plastic, other	Toy, adult, rubber-like material	AG124	PL24	yes	2																																				1
Ritoque	11	2021-05-01	quant	26	HPL	HPL fragments, not PET	HPL fragment	AG79	PL24	yes	1																	1
Ritoque	11	2021-05-01	quant	28	HPL	HPL caps and lids	HPL cap grey	AG20	PL21	yes	1
Ritoque	11	2021-05-01	quant	29	HPL	HPL caps and lids	Cap, yellow PL ring, maybe from gas bottle (?)	AG20	PL17	yes	1
Ritoque	11	2021-05-01	quant	30	TPL	Packaging TPL	packaging, transparent	AG30		yes	1																	1
Ritoque	11	2021-05-01	quant	31	HPL	HPL items, other	HPL item, PP (code 5), black	AG79	PL24	yes	2																	1
Ritoque	11	2021-05-01	quant	32	TPL	Food containers, not foamed, SUP	Yoghurt cup, Polystyrene (PS), not foamed	AG10	PL06	yes	1
Ritoque	11	2021-05-01	quant	33	TPL	Packaging TPL	food wrapper, type sweets colored	AG30		yes	2																	1
Ritoque	11	2021-05-01	quant	34	TPL	Bags	PL bag, transparent, not like supermarket bag	AG2	PL07	yes	1																	1
Ritoque	11	2021-05-01	quant	35	HPL	Bottles	Bottle detergent, upper part, Chlorox	AG6	PL02	yes	2																	1
Ritoque	11	2021-05-01	add	36	HPL	HPL items, other	HPL chewing gum roll yellow	AG10	PL06	yes	2																																				1
Ritoque	12	2021-05-02	quant	1	Other, mix	Textile & shoes	Shoe boot	AG135	CL01	yes	2
Ritoque	12	2021-05-02	quant	2	HPL	HPL items, other	HPL cleaning device	AG124	PL24	yes	1
Ritoque	12	2021-05-02	quant	3	TPL	Food containers, not foamed, SUP	single-use container, thin PL	AG10	PL06	yes	1																	1
Ritoque	12	2021-05-02	quant	4	TPL	Cups, not foamed, SUP	single use cup, thin PL, transparent	AG33	PL06	yes	2																	1
Ritoque	12	2021-05-02	quant	5	HPL	(Beach) toys	Beach toy	AG32	PL08	yes	1
Ritoque	12	2021-05-02	quant	6	HPL	HPL fragments, not PET	HPl fragment	AG79	PL24	yes	2																	1
Ritoque	12	2021-05-02	quant	7	TPL	Packaging TPL	Fragment, "sheeting"	AG66	PL16	yes	1																	1
Ritoque	12	2021-05-02	quant	8	TPL	Bags	Bag fragment	AG2	PL07	yes	3																	1
Ritoque	12	2021-05-02	quant	9	TPL	Cups, not foamed, SUP	single-use cup, transparent, thin PL	AG33	PL06	yes	1																	1
Ritoque	12	2021-05-02	quant	10	TPL	Packaging TPL	food wrapper "masticazoo"	AG30		yes	1																	1
Ritoque	12	2021-05-02	quant	11	HPL	HPL caps and lids	Lid, transparent	AG20	PL31	yes	1																	1
Ritoque	12	2021-05-02	quant	12	HPL	Lollipop sticks	HPL lollypop stick	AG31	PL06	yes	1
Ritoque	12	2021-05-02	quant	13	TPL	Packaging TPL	food wrapper, type sweets	AG30		yes	2																	1
Ritoque	12	2021-05-02	quant	14	TPL	Packaging TPL	food wrapper, type sweets	AG30		yes	1
Ritoque	12	2021-05-02	quant	15	OPL	Syringes	Syringe	AG99	PL12	yes	1
Ritoque	12	2021-05-02	quant	16	TPL	Packaging TPL	food wrapper, type sweets	AG30		yes	1																	1
Ritoque	12	2021-05-02	quant	18	TPL	Packaging TPL	food wrapper, type sweets	AG30		yes	1
Ritoque	12	2021-05-02	quant	19	HPL	HPL fragments, not PET	HPl fragment	AG79	PL24	yes	1
Ritoque	12	2021-05-02	quant	20	HPL	HPL caps and lids	cap/tap	AG20	PL18	yes	1
Ritoque	12	2021-05-02	quant	21	HPL	HPL fragments, not PET	HPl fragment	AG79	PL24	yes	1
Ritoque	12	2021-05-02	quant	22	HPL	HPL fragments, not PET	HPl fragment	AG79	PL24	yes	2																	1
Ritoque	12	2021-05-02	quant	23	HPL	HPL fragments, not PET	HPl fragment, blue	AG79	PL24	yes	1
Ritoque	12	2021-05-02	quant	24	OPL	Foams, other	Foam fragment	AG82		yes	1
Ritoque	12	2021-05-02	add	26	HPL	Bottles	bottle, not PET	AG6	PL02	yes	3																																				1
Ritoque	12	2021-05-02	add	27	HPL	Fishing light sticks & lures	Fishing light stick	AG60	PL17	yes	1
Ritoque	12	2021-05-02	quant	29	TPL	Packaging TPL	packaging, transparent	AG30		yes	1																	1
Ritoque	12	2021-05-02	quant	30	TPL	Packaging TPL	packaging, transparent	AG30		yes	1																	1
Ritoque	12	2021-05-02	quant	31	TPL	Packaging TPL	packaging, transparent, cigarettes	AG25		yes	1																	1
Ritoque	12	2021-05-02	quant	32	TPL	Packaging TPL	packaging, transparent	AG30		yes	1																	1
Ritoque	12	2021-05-02	quant	33	TPL	Packaging TPL	packaging, transparent, cigarettes	AG25		yes	1																	1
Ritoque	12	2021-05-02	quant	35	HPL	HPL caps and lids	Bottle cap	AG20	PL32	yes	2				1
Ritoque	12	2021-05-02	quant	36	TPL	Cups, not foamed, SUP	single-use cup, transparent	AG33	PL06	yes	1																	1
Ritoque	12	2021-05-02	add	37	Rope	Ropes and rope bundles, synthetic	Rope	AG48	PL19	nd	11												1																					1		1	1
Ritoque	12	2021-05-02	add	38	HPL	HPL fragments, not PET	HPL fragment, blue	AG79	PL24	nd	2																																				1
										Average	1.68312
										St.Dev	1.25762
[truncated: 23 more columns]

## Sheet: Epibionts Maitencillo
Beach	Day	Date	quant/add	Raft ID	Main category	Subcategory	Description	JML	UNEP	floats?	∑ species	Bryozoa, encrusting, ni	Schizoporelloidea, ni	Flustrina, ni	Fenestrulina sp.	Hippaliosina dorbignyana	Membranipora sp.	Bugula neritina	Hippothoidae ni	Chaperia sp.	Lagenicella variabilis	Lepas pectinata	Lepas sp.	Barnacles, cyprids only	Spirorbinae, ni	Sabellariidae, ni	Hydroids, ni	Mytilidae, ni	Brachyura, ni	Porcellanidae, ni	Notochthamalus scabrosus	Balanus laevis	Balanidae, ni	Austromegabalanus psittacus	Verruca laevigata	Trochita trochiformis	Chthamalidae, ni	Rosalina globularis d’Orbigny, 1826
Maitencillo	0	2021-04-20	add	1	Other, mix	Textile & shoes	Shoesole	AG135	CL01	yes	1															1
Maitencillo	0	2021-04-20	add	2	TPL	Cutlery, SUP	Cup, transparent, single-use	AG10	PL04	yes	4						1	1										1					1
Maitencillo	1	2021-04-21	quant	1	HPL	HPL items, other	Knife handle	AG79	PL24	nd	2	1													1
Maitencillo	1	2021-04-21	quant	2	OPL	Sanitary mask	Sanitary single-use mask	AG211	OT05	nd	1																		1
Maitencillo	2	2021-04-22	quant	2	TPL	Packaging TPL	Food wrapper	AG30		yes	1																	1
Maitencillo	2	2021-04-22	quant	3	HPL	HPL caps and lids	Bottle cap HPL blue	AG20	PL01	yes	4					1											1								1		1
Maitencillo	3	2021-04-23	quant	10B	TPL	Bags, TPL	Bag fragment	AG2	PL07	yes	1																	1
Maitencillo	3	2021-04-23	quant	11A	TPL	Packaging TPL	Food wrapper	AG30		nd	1	1
Maitencillo	3	2021-04-23	quant	11B	OPL	Mesh bags	Meshbag, yellow	AG37	PL15	yes	2														1			1
Maitencillo	3	2021-04-23	quant	1A	Ropes	Ropes and rope bundles, synthetic	Rope	AG48	PL19	nd	1																	1
Maitencillo	3	2021-04-23	quant	1B	TPL	Food containers, not foamed, SUP	PL food container, single-use	AG10	PL06	yes	1						1
Maitencillo	3	2021-04-23	quant	2A	TPL	Packaging TPL	Food wrapper	AG30		yes	1																	1
Maitencillo	3	2021-04-23	quant	3A	TPL	Bags, TPL	Plastic bag fragment	AG2	PL07	nd	1																	1
Maitencillo	3	2021-04-23	quant	3B	Other, Mix	Rope, not synthetic	Rope, not synthetic?	AG142	CL04	yes	1																	1
Maitencillo	3	2021-04-23	quant	4A	TPL	Packaging TPL	Food wrapper	AG30		nd	2																1	1
Maitencillo	3	2021-04-23	quant	4B	TPL	Strapping TPL	Strapping band, fragment	AG66	PL21	yes	2																	1								1
Maitencillo	3	2021-04-23	quant	5A	TPL	Packaging TPL	Food wrapper	AG30		yes	2																1	1
Maitencillo	3	2021-04-23	quant	5B	TPL	Packaging TPL	Packaging of sanitary towel	AG30		yes	1																	1
Maitencillo	3	2021-04-23	quant	7A	HPL	HPL fragments, not PET	HPL fragment	AG79	PL24	yes	1												1
Maitencillo	3	2021-04-23	quant	7B	TPL	Packaging TPL	Food wrapper	AG30		yes	1																	1
Maitencillo	3	2021-04-23	quant	8A	Ropes	Ropes and rope bundles, synthetic	Rope	AG48	PL19	yes	2											1						1
Maitencillo	3	2021-04-23	quant	9A	TPL	Packaging TPL	Food wrapper	AG30		nd	1																		1
Maitencillo	3	2021-04-23	quant	9B	TPL	Packaging TPL	Food wrapper	AG30		yes	1																	1
Maitencillo	4	2021-04-24	quant	1	HPL	Crates, baskets, buckets	Bucket fragment HDPE	AG65	PL03	yes	6								1	1				1	1		1					1				1
Maitencillo	4	2021-04-24	quant	2	Other, mix	Metal	Fish hook with line	AG182	ME07	nd	1																	1
Maitencillo	4	2021-04-24	quant	4	TPL	Packaging TPL	Food wrapper	AG30		yes	1													1
Maitencillo	4	2021-04-24	quant	5	TPL	Bags, TPL	Bag fragment	AG2	PL07	nd	1																	1
Maitencillo	4	2021-04-24	quant	6	TPL	Packaging TPL	Food wrapper	AG30		yes	1													1
Maitencillo	4	2021-04-24	quant	7	HPL	Crates, baskets, buckets	Bucket fragment	AG65	PL03	yes	1													1
Maitencillo	5	2021-04-25	quant	3	TPL	Bags, TPL	Bag, black	AG2	PL07	yes	1											1
Maitencillo	5	2021-04-25	quant	4	Ropes	Ropes and rope bundles, synthetic	Rope	AG48	PL19	yes	2													1						1
Maitencillo	5	2021-04-25	quant	5	Other, mix	Glass & ceramics	Brick, construction	AG204	GC01	no	1																					1
Maitencillo	5	2021-04-25	quant	6	TPL	Packaging TPL	Food wrapper	AG30		yes	1													1
Maitencillo	5	2021-04-25	quant	7	HPL	HPL fragments, not PET	HPL fragment	AG79	PL24	nd	1				1
Maitencillo	5	2021-04-25	quant	8	Ropes	Ropes and rope bundles, synthetic	Rope	AG48	PL19	nd	1																	1
Maitencillo	5	2021-04-25	quant	9	Ropes	Ropes and rope bundles, synthetic	Rope bundle	AG48	PL19	nd	1																	1
Maitencillo	6	2021-04-26	quant	1	HPL	(Beach) toys	Beach toy	AG32	PL08	yes	1													1
Maitencillo	6	2021-04-26	quant	3	Ropes	Ropes and rope bundles, synthetic	Rope	AG48	PL19	yes	1																	1
Maitencillo	6	2021-04-26	quant	5	HPL	HPL caps and lids	Bottle cap ring	AG20	PL01	yes	1																					1
Maitencillo	7	2021-04-27	quant	1	TPL	Packaging TPL	Food wrapper	AG30		yes	1												1
Maitencillo	7	2021-04-27	quant	2	HPL	HPL items, other	HPL item	AG79	PL24	yes	1												1
Maitencillo	7	2021-04-27	quant	3	TPL	Packaging TPL	Food wrapper	AG30		yes	1													1
Maitencillo	7	2021-04-27	quant	4	TPL	Packaging TPL	Food wrapper	AG30		yes	1						1
Maitencillo	7	2021-04-27	quant	5	TPL	Bags, TPL	Bag, transparent	AG2	PL07	yes	1						1
Maitencillo	7	2021-04-27	quant	6	TPL	Packaging TPL	Food wrapper	AG30		yes	1												1
Maitencillo	7	2021-04-27	quant	8	Ropes	Ropes and rope bundles, synthetic	Rope	AG48	PL19	nd	1																	1
Maitencillo	8	2021-04-28	quant	3	Ropes	Ropes and rope bundles, synthetic	Rope	AG48	PL19	yes	2	1																1
Maitencillo	8	2021-04-28	quant	5	Other, mix	Glass & ceramics	Ceramic fragment	AG208	GC07	yes	1																					1
Maitencillo	8	2021-04-28	quant	6	TPL	Packaging TPL	Food wrapper	AG30		yes	1																1
Maitencillo	8	2021-04-28	quant	9	TPL	Packaging TPL	Food wrapper	AG30		unclear	3			1											1						1
Maitencillo	8	2021-04-28	quant	10	TPL	Cutlery, SUP	Cup, transparent, single-use	AG10	PL04	yes	1						1
Maitencillo	8	2021-04-28	quant	11	HPL	(Beach) toys	Toy Plastic	AG32	PL08	yes	4									1	1				1								1
Maitencillo	8	2021-04-28	quant	12	TPL	Packaging TPL	Food wrapper	AG30		yes	1												1
Maitencillo	8	2021-04-28	quant	13	TPL	Packaging TPL	Food wrapper	AG30		yes	2																	1										1
Maitencillo	8	2021-04-28	quant	15	HPL	HPL caps and lids	Bottle cap, ring, red	AG20	PL01	yes	2			1																					1
Maitencillo	8	2021-04-28	quant	16	Other, Mix	Rope, not synthetic	Rope, not synthetic?	AG142	CL04	no	2	1																1
Maitencillo	9	2021-04-29	quant	1	TPL	Packaging TPL	Food wrapper	AG30		yes	1						1
Maitencillo	9	2021-04-29	quant	3	HPL	HPL caps and lids	HPL bottle cap, white, fragment	AG20	PL01	yes	2																1						1
Maitencillo	9	2021-04-29	quant	4	TPL	Packaging TPL	Food wrapper	AG30		yes	1																	1
Maitencillo	10	2021-04-30	quant	1	TPL	Packaging TPL	Bubble wrap	AG66	PL16	yes	1																	1
Maitencillo	10	2021-04-30	quant	2	TPL	Packaging TPL	Food wrapper	AG30		yes	3						1										1	1
Maitencillo	10	2021-04-30	quant	3	Ropes	Ropes and rope bundles, synthetic	Rope, white, PL	AG48	PL19	yes	1																	1
Maitencillo	10	2021-04-30	quant	5	TPL	Packaging TPL	Food wrapper	AG30		yes	1													1
Maitencillo	10	2021-04-30	quant	6	HPL	HPL caps and lids	Cap of tetrapak	AG20	PL01	yes	1											1
Maitencillo	11	2021-05-01	quant	1	TPL	Bags, TPL	PL bag, not supermarket type	AG2	PL07	yes	1						1
Maitencillo	11	2021-05-01	quant	3	Ropes	Ropes and rope bundles, synthetic	Rope	AG48	PL19	yes	1												1
Maitencillo	11	2021-05-01	quant	4	HPL	HPL caps and lids	HPL bottle cap Fragment	AG20	PL01	yes	2																1							1
Maitencillo	11	2021-05-01	quant	5	HPL	HPL fragments, not PET	HPL, fragment, red	AG79	PL24	yes	2																1					1
Maitencillo	11	2021-05-01	quant	6	Ropes	Ropes and rope bundles, synthetic	Rope green	AG48	PL19	yes	1																	1
Maitencillo	12	2021-05-02	quant	1	TPL	Packaging TPL	Food wrapper	AG30		yes	1																1
Maitencillo	12	2021-05-02	quant	3	HPL	HPL items, other	HPL object. Piece of bucket lid?	AG79	PL24	yes	2		1	1											1
										Average	1.46479
										St.Dev	0.923208

[truncated: 3 more sheets: Epibionts Choros, Buoyancy tests clean items, Lepas spp capitellum lengths]
